# Supplementary material
Source: publisher site journal article supplement (https://www.spandidos-publications.com/1964/downloadSupplementary)
Supplement: Supplementary file 1 [file downloadSupplementary]

## Sheet: Different Gene
Table SI. Differentially expressed genes after SAR1 gene homolog B knockdown in RKO cells.
Entrez	Gene Symbol	Gene Title	E7801-1	E7801-2	E7801-3	E7802-1	E7802-2	E7802-3	Fold Change	logFC	absolute FC	Regulation	P-value	FDR
27430	MAT2B	methionine adenosyltransferase II, beta	7.93867	7.96835	8.03739	7.01665	7.07738	6.99991	-1.93208	-0.950157	1.93208	down	3.42981e-11	9.49671e-09
10327	AKR1A1	aldo-keto reductase family 1, member A1 (aldehyde reductase)	9.58302	9.62708	9.54743	8.85394	8.95345	8.87076	-1.61678	-0.693127	1.61678	down	9.26241e-11	1.81184e-08
200933	FBXO45	F-box protein 45	6.03367	6.07097	6.10671	5.41309	5.47734	5.53368	-1.51125	-0.595747	1.51125	down	5.25201e-07	9.87559e-06
102724197	LOC102724197	inactive gamma-glutamyltranspeptidase 2-like	5.92034	5.76946	5.74232	5.01344	5.29668	5.31585	-1.51787	-0.60205	1.51787	down	1.34655e-05	0.00012932
253260	RICTOR	RPTOR independent companion of MTOR, complex 2	5.40622	5.27772	5.24514	4.49092	4.74279	4.77808	-1.55735	-0.639097	1.55735	down	7.50733e-06	8.10693e-05
80862	ZNRD1-AS1	ZNRD1 antisense RNA 1	4.87393	4.90066	4.61334	5.52539	5.3221	5.43328	1.54858	0.630947	1.54858	up	9.96037e-06	0.000102144
2678	GGT1	gamma-glutamyltransferase 1	5.92034	5.76946	5.74232	5.01344	5.29668	5.31585	-1.51787	-0.60205	1.51787	down	1.34655e-05	0.00012932
4072	EPCAM	epithelial cell adhesion molecule	6.55978	6.7585	6.66228	6.12415	6.1572	5.88117	-1.52205	-0.606013	1.52205	down	3.57991e-06	4.46985e-05
137209	ZNF572	zinc finger protein 572	5.92549	5.81419	5.96032	6.46182	6.50108	6.54632	1.51895	0.603073	1.51895	up	2.93088e-07	6.20885e-06
58496	LY6G5B	lymphocyte antigen 6 complex, locus G5B	4.26755	4.11986	4.40213	5.29752	5.01799	5.16206	1.86091	0.89601	1.86091	up	3.57059e-07	7.26908e-06
23643	LY96	lymphocyte antigen 96	4.56665	4.56665	4.64134	3.94994	3.84984	3.94059	-1.60002	-0.67809	1.60002	down	9.33059e-07	1.53691e-05
4149	MAX	MYC associated factor X	7.14821	7.01004	6.92302	7.57647	7.76955	7.57504	1.52972	0.613263	1.52972	up	5.0303e-07	9.55004e-06
4978	OPCML	opioid binding protein/cell adhesion molecule-like	6.49993	6.51657	6.43675	5.32814	5.03544	5.13635	-2.49281	-1.31777	2.49281	down	2.85317e-10	3.88169e-08
55233	MOB1A	MOB kinase activator 1A	8.31766	8.42675	8.3404	8.94159	8.93289	8.96554	1.50011	0.58507	1.50011	up	1.40367e-09	1.17424e-07
153129	SLC38A9	solute carrier family 38, member 9	6.40413	6.47537	6.40921	7.03121	7.0638	7.02449	1.52654	0.610263	1.52654	up	3.01667e-08	1.12589e-06
23484	LEPROTL1	leptin receptor overlapping transcript-like 1	7.77638	7.82658	7.7869	6.92899	6.92305	6.82358	-1.87222	-0.904747	1.87222	down	9.08232e-11	1.78549e-08
5202	PFDN2	prefoldin subunit 2	10.376	10.4129	10.3121	9.74663	9.82735	9.73097	-1.51435	-0.5987	1.51435	down	3.03031e-10	4.06464e-08
163882	CNST	consortin, connexin sorting protein	7.60495	7.58285	7.61835	6.63224	6.84451	6.66874	-1.84918	-0.886887	1.84918	down	1.16824e-09	1.02529e-07
54875	CNTLN	centlein	5.28652	5.45997	5.44547	4.89399	4.83479	4.69621	-1.50419	-0.58899	1.50419	down	6.66879e-06	7.38394e-05
7046	TGFBR1	transforming growth factor, beta receptor 1	9.34922	9.30043	9.36955	8.65572	8.63161	8.58663	-1.64157	-0.71508	1.64157	down	3.82588e-11	1.01639e-08
378938	MALAT1	metastasis associated lung adenocarcinoma transcript 1 (non-protein coding)	8.6258	8.7099	8.70931	9.3394	9.3483	9.35096	1.58507	0.66455	1.58507	up	8.713e-11	1.75681e-08
996	CDC27	cell division cycle 27	8.92617	8.94186	8.87695	9.5831	9.69941	9.66477	1.66336	0.7341	1.66336	up	4.75096e-11	1.17658e-08
8334	HIST1H2AC	histone cluster 1, H2ac	6.01876	5.71805	5.9888	6.81949	7.07131	6.90695	2.03362	1.02405	2.03362	up	1.9832e-08	8.25138e-07
26973	CHORDC1	cysteine and histidine rich domain containing 1	5.93917	6.0165	5.98299	4.61729	4.73208	4.67862	-2.46837	-1.30356	2.46837	down	7.95827e-11	1.67328e-08
125228	FAM210A	family with sequence similarity 210 member A	8.38094	8.31894	8.20514	7.63283	7.66581	7.62136	-1.58192	-0.661673	1.58192	down	4.39393e-09	2.7029e-07
4907	NT5E	5'-nucleotidase, ecto (CD73)	5.80005	5.52649	5.57134	6.4669	6.41132	6.54088	1.79055	0.840407	1.79055	up	6.46274e-08	1.98053e-06
10640	EXOC5	exocyst complex component 5	7.29082	7.40618	7.50123	6.82653	6.74783	6.81406	-1.51916	-0.60327	1.51916	down	1.34144e-07	3.43283e-06
687	KLF9	Kruppel-like factor 9	7.63594	7.63702	7.63789	8.55269	8.52771	8.60371	1.89792	0.92442	1.89792	up	5.39111e-12	2.71753e-09
7227	TRPS1	trichorhinophalangeal syndrome I	6.04052	6.0662	5.99042	6.69123	6.59851	6.73439	1.56085	0.64233	1.56085	up	8.46454e-08	2.42572e-06
3669	ISG20	interferon stimulated exonuclease gene 20kDa	8.74861	8.75291	8.79488	7.98594	8.09756	8.04275	-1.65105	-0.723383	1.65105	down	1.61307e-10	2.5471e-08
1203	CLN5	ceroid-lipofuscinosis, neuronal 5	6.5865	6.70967	6.53864	5.49692	5.68665	5.45569	-2.09244	-1.06518	2.09244	down	2.58455e-09	1.84427e-07
246175	CNOT6L	CCR4-NOT transcription complex subunit 6-like	7.22815	7.19022	7.20646	6.29619	6.42937	6.06704	-1.92396	-0.944077	1.92396	down	1.54035e-08	6.78497e-07
9412	MED21	mediator complex subunit 21	7.7893	7.76852	7.78358	6.9082	6.8054	6.94874	-1.85706	-0.89302	1.85706	down	1.55421e-10	2.53562e-08
147694	ZNF548	zinc finger protein 548	6.16175	6.31191	6.40737	6.78442	6.90361	7.01608	1.52382	0.607693	1.52382	up	1.85675e-06	2.65709e-05
153443	SRFBP1	serum response factor binding protein 1	9.05429	9.15962	9.25775	8.60788	8.38256	8.539	-1.56635	-0.647407	1.56635	down	5.68645e-08	1.78864e-06
23116	FAM179B	family with sequence similarity 179 member B	6.62719	6.68891	6.69993	7.32314	7.25308	7.25308	1.52037	0.604423	1.52037	up	2.48804e-08	9.77268e-07
7754	ZNF204P	zinc finger protein 204, pseudogene	7.3333	7.36078	7.25744	8.05763	7.88681	7.97213	1.57463	0.655017	1.57463	up	1.23453e-08	5.84574e-07
692149	SCARNA14	small Cajal body-specific RNA 14	7.15504	7.10858	7.08002	7.76559	7.90919	7.80371	1.63764	0.711617	1.63764	up	2.88427e-09	2.00006e-07
7697	ZNF138	zinc finger protein 138	5.05501	4.84746	5.18136	4.3705	4.31606	4.21272	-1.65655	-0.728183	1.65655	down	2.86583e-06	3.76599e-05
4088	SMAD3	SMAD family member 3	5.78725	5.70366	5.71173	6.69229	6.49804	6.27916	1.68835	0.755617	1.68835	up	1.04391e-06	1.68146e-05
871	SERPINH1	serpin peptidase inhibitor, clade H (heat shock protein 47), member 1, (collagen binding protein 1)	9.57722	9.47033	9.45108	10.0854	10.2088	10.1342	1.56185	0.64326	1.56185	up	6.32416e-10	6.70225e-08
85480	TSLP	thymic stromal lymphopoietin	5.39214	5.38677	5.23309	4.89447	4.37932	4.3897	-1.72051	-0.782837	1.72051	down	1.89391e-05	0.000170673
80179	MYO19	myosin XIX	6.45159	6.45872	6.47931	5.8909	5.84287	5.77222	-1.54529	-0.627877	1.54529	down	1.12944e-07	3.01068e-06
4853	NOTCH2	notch 2	7.23455	7.38263	7.45855	6.77775	6.71851	6.75016	-1.52602	-0.60977	1.52602	down	1.48646e-07	3.72558e-06
151194	METTL21A	methyltransferase like 21A	7.69182	7.61304	7.71054	8.53071	8.26167	8.37789	1.64523	0.71829	1.64523	up	1.94825e-08	8.15775e-07
79939	SLC35E1	solute carrier family 35 member E1	8.57334	8.54048	8.6062	7.97975	8.02474	7.95068	-1.50346	-0.588283	1.50346	down	1.68528e-09	1.34405e-07
7771	ZNF112	zinc finger protein 112	5.82402	5.85426	5.87049	6.69266	6.70556	6.77924	1.83557	0.87623	1.83557	up	1.18476e-09	1.03238e-07
9411	ARHGAP29	Rho GTPase activating protein 29	7.23521	7.32768	7.31822	6.63397	6.64241	6.59514	-1.59092	-0.669863	1.59092	down	7.44224e-09	4.04163e-07
3988	LIPA	lipase A, lysosomal acid, cholesterol esterase	8.36333	8.32487	8.31949	8.91236	8.97386	8.89799	1.50752	0.592173	1.50752	up	6.97462e-10	7.11036e-08
127262	TPRG1L	tumor protein p63 regulated 1-like	7.42473	7.41551	7.35238	8.13478	8.28678	8.19607	1.75119	0.808337	1.75119	up	3.58064e-10	4.5561e-08
54555	DDX49	DEAD (Asp-Glu-Ala-Asp) box polypeptide 49	7.58268	7.44731	7.43129	7.98222	8.21296	8.0407	1.50685	0.591533	1.50685	up	2.69984e-07	5.81339e-06
84910	TMEM87B	transmembrane protein 87B	6.39784	6.61722	6.63452	5.73675	5.52475	5.75362	-1.83802	-0.878153	1.83802	down	7.47463e-08	2.20142e-06
26292	MYCBP	MYC binding protein	7.77501	7.75533	7.79452	8.55039	8.43401	8.3573	1.59359	0.67228	1.59359	up	4.14031e-09	2.57577e-07
10082	GPC6	glypican 6	5.59638	5.64465	5.7029	4.303	4.58519	4.66579	-2.18856	-1.12998	2.18856	down	1.63874e-08	7.1591e-07
729533	FAM72A	family with sequence similarity 72 member A	7.88685	7.89132	7.86845	7.28342	7.26985	7.11206	-1.58055	-0.66043	1.58055	down	1.05411e-08	5.22643e-07
6655	SOS2	SOS Ras/Rho guanine nucleotide exchange factor 2	7.09916	7.17217	7.31335	8.07572	7.8331	8.01433	1.71652	0.77949	1.71652	up	3.11706e-08	1.1472e-06
5925	RB1	retinoblastoma 1	6.5547	6.60292	6.69124	7.32621	7.34428	7.31781	1.63938	0.713147	1.63938	up	4.93356e-09	2.93461e-07
9815	GIT2	G protein-coupled receptor kinase interacting ArfGAP 2	8.1865	8.16265	8.14258	8.80525	8.92974	8.90835	1.64399	0.717203	1.64399	up	2.23203e-10	3.27458e-08
51019	CCDC53	coiled-coil domain containing 53	7.87901	7.7912	7.80596	8.40374	8.4903	8.40983	1.52545	0.609233	1.52545	up	3.00342e-09	2.05729e-07
66008	TRAK2	trafficking protein, kinesin binding 2	4.22117	4.56193	4.36391	5.10122	4.93079	4.88754	1.50613	0.590847	1.50613	up	3.83882e-05	0.000304919
5411	PNN	pinin, desmosome associated protein	8.77949	8.70062	8.72694	9.33279	9.32767	9.37789	1.52672	0.610433	1.52672	up	2.44002e-10	3.46341e-08
4076	CAPRIN1	cell cycle associated protein 1	5.28105	5.06972	4.99468	5.80266	5.76261	5.64836	1.53978	0.622727	1.53978	up	5.27299e-06	6.10673e-05
23621	BACE1	beta-site APP-cleaving enzyme 1	5.22237	5.35492	5.34748	4.67175	4.88248	4.56211	-1.51867	-0.60281	1.51867	down	1.39414e-05	0.000132949
2965	GTF2H1	general transcription factor IIH subunit 1	7.80706	7.77638	7.72742	6.84419	7.00677	6.97788	-1.77441	-0.82734	1.77441	down	8.89187e-10	8.4447e-08
10128	LRPPRC	leucine rich pentatricopeptide repeat containing	7.36148	7.31341	7.25102	6.67014	6.70772	6.6251	-1.55939	-0.640983	1.55939	down	1.68996e-08	7.33396e-07
4602	MYB	v-myb avian myeloblastosis viral oncogene homolog	4.89917	5.00837	5.16188	4.55569	4.352	4.35373	-1.51852	-0.602667	1.51852	down	1.63551e-05	0.000151377
10921	RNPS1	RNA binding protein S1, serine-rich domain	8.15441	8.19907	8.09483	7.37816	7.44391	7.38553	-1.67819	-0.746903	1.67819	down	3.93214e-10	4.84652e-08
10491	CRTAP	cartilage associated protein	6.54462	6.58572	6.49998	5.66808	5.87976	5.67731	-1.74318	-0.801723	1.74318	down	3.47034e-08	1.23258e-06
79894	ZNF672	zinc finger protein 672	8.90257	8.95078	8.84195	7.87918	8.01591	7.93665	-1.93793	-0.95452	1.93793	down	1.72595e-11	6.05903e-09
9649	RALGPS1	Ral GEF with PH domain and SH3 binding motif 1	6.31555	6.18363	6.2866	5.53839	5.68946	5.60719	-1.56944	-0.650247	1.56944	down	2.91836e-07	6.189e-06
9778	KIAA0232	KIAA0232	7.52885	7.63855	7.56179	8.14565	8.15041	8.19606	1.50279	0.587643	1.50279	up	6.31667e-09	3.54292e-07
22900	CARD8	caspase recruitment domain family member 8	5.47335	5.33704	5.34496	6.32976	6.36641	6.15661	1.86496	0.899143	1.86496	up	1.82032e-08	7.71384e-07
255252	LRRC57	leucine rich repeat containing 57	7.64462	7.64368	7.53371	8.19365	8.21097	8.19682	1.50853	0.593143	1.50853	up	5.62435e-09	3.25682e-07
55975	KLHL7	kelch like family member 7	6.65829	6.75318	6.79713	7.47433	7.33562	7.4588	1.60962	0.686717	1.60962	up	2.03416e-08	8.40421e-07
1955	MEGF9	multiple EGF-like-domains 9	6.0372	6.1364	5.80412	6.84386	6.82037	6.85181	1.79764	0.846107	1.79764	up	5.33465e-08	1.70944e-06
23468	CBX5	chromobox 5	5.79173	5.65275	5.76929	6.55205	6.4684	6.3811	1.65779	0.72926	1.65779	up	7.66395e-08	2.24372e-06
1954	MEGF8	multiple EGF-like-domains 8	6.33167	6.49809	6.53721	6.95485	7.15828	7.15479	1.55149	0.63365	1.55149	up	6.66268e-07	1.18912e-05
7529	YWHAB	tyrosine 3-monooxygenase/tryptophan 5-monooxygenase activation protein, beta	7.56061	7.83603	8.10857	8.65783	8.13004	8.52455	1.51824	0.602403	1.51824	up	0.000423473	0.00223942
54545	MTMR12	myotubularin related protein 12	8.00297	8.04316	8.16097	8.71982	8.7412	8.7247	1.57958	0.65954	1.57958	up	1.50178e-09	1.23933e-07
23376	UFL1	UFM1-specific ligase 1	9.08658	9.09111	9.27454	8.58962	8.39417	8.45851	-1.59105	-0.669977	1.59105	down	2.54865e-08	9.94124e-07
57678	GPAM	glycerol-3-phosphate acyltransferase, mitochondrial	6.48624	6.57751	6.61374	7.42322	7.42032	7.32073	1.77636	0.828927	1.77636	up	1.34863e-09	1.14033e-07
8829	NRP1	neuropilin 1	6.50713	6.58755	6.45968	7.18823	7.11229	7.12844	1.54207	0.624867	1.54207	up	3.96214e-08	1.36652e-06
3069	HDLBP	high density lipoprotein binding protein	6.63911	6.6889	6.61859	5.57722	5.91951	6.01507	-1.75516	-0.8116	1.75516	down	7.91292e-07	1.3592e-05
1195	CLK1	CDC like kinase 1	8.17794	8.33077	8.26568	7.70559	7.64592	7.61101	-1.51988	-0.603957	1.51988	down	1.27307e-08	5.95886e-07
137835	TMEM71	transmembrane protein 71	4.70777	4.44538	4.67163	3.89902	4.11151	3.93979	-1.54202	-0.62482	1.54202	down	1.6658e-05	0.000153638
22832	CEP162	centrosomal protein 162kDa	3.41484	3.34192	3.71542	4.26783	4.03681	4.08534	1.55754	0.639267	1.55754	up	4.80088e-05	0.000366526
133015	PACRGL	PARK2 co-regulated like	5.70955	5.51023	5.51073	6.16339	6.16842	6.16961	1.50556	0.590303	1.50556	up	1.34601e-06	2.05567e-05
5519	PPP2R1B	protein phosphatase 2 regulatory subunit A, beta	6.60204	6.60843	6.69123	7.737	7.74263	7.70422	2.13472	1.09405	2.13472	up	8.25019e-12	3.72852e-09
10778	ZNF271P	zinc finger protein 271, pseudogene	6.32677	6.53288	6.50484	7.23527	7.25307	7.27821	1.74193	0.800687	1.74193	up	6.68919e-09	3.73057e-07
10730	YME1L1	YME1 like 1 ATPase	6.89448	6.93169	6.81229	6.06147	6.18148	6.29807	-1.62354	-0.699147	1.62354	down	1.1717e-07	3.10021e-06
135114	HINT3	histidine triad nucleotide binding protein 3	6.15089	6.09678	6.08362	6.81385	6.62096	6.73459	1.52912	0.612703	1.52912	up	2.54737e-07	5.58603e-06
27343	POLL	polymerase (DNA directed), lambda	5.45282	5.60636	5.42733	4.81917	4.65816	4.98648	-1.59575	-0.674233	1.59575	down	4.96848e-06	5.814e-05
1508	CTSB	cathepsin B	7.63439	7.62854	7.69607	8.6312	8.39743	8.42201	1.77836	0.830547	1.77836	up	1.83793e-09	1.42532e-07
222234	FAM185A	family with sequence similarity 185 member A	5.00714	5.08439	5.00163	5.46599	5.81372	5.80981	1.58607	0.665453	1.58607	up	6.91398e-06	7.59764e-05
84679	SLC9A7	solute carrier family 9, subfamily A (NHE7, cation proton antiporter 7), member 7	6.34368	6.3237	6.26973	5.55506	5.83182	5.58114	-1.5761	-0.656363	1.5761	down	1.14232e-06	1.80667e-05
2571	GAD1	glutamate decarboxylase 1	6.98367	6.95499	6.9881	6.29175	6.34842	6.30813	-1.57952	-0.659487	1.57952	down	1.2167e-08	5.79858e-07
330	BIRC3	baculoviral IAP repeat containing 3	7.75158	7.85734	7.86458	7.09469	7.04123	6.86572	-1.77025	-0.823953	1.77025	down	4.83438e-09	2.90273e-07
128866	CHMP4B	charged multivesicular body protein 4B	9.39804	9.40931	9.36305	8.60804	8.73795	8.68368	-1.63986	-0.713577	1.63986	down	1.03509e-10	1.91069e-08
7629	ZNF76	zinc finger protein 76	5.09481	5.2355	4.94721	5.57702	5.77912	5.75947	1.52911	0.612697	1.52911	up	9.0611e-06	9.455e-05
51304	ZDHHC3	zinc finger, DHHC-type containing 3	7.49603	7.41475	7.50724	6.65421	6.66302	6.76391	-1.71589	-0.77896	1.71589	down	1.72327e-09	1.36879e-07
8202	NCOA3	nuclear receptor coactivator 3	7.73126	7.87085	7.98168	8.63949	8.60239	8.61079	1.68915	0.756293	1.68915	up	3.43958e-09	2.25021e-07
4864	NPC1	Niemann-Pick disease, type C1	8.02864	8.07063	7.987	6.95163	7.17996	7.08883	-1.93896	-0.955283	1.93896	down	3.46391e-10	4.45078e-08
7095	SEC62	SEC62 homolog, preprotein translocation factor	7.26736	7.29871	7.20595	6.58224	6.58295	6.72303	-1.54535	-0.627933	1.54535	down	5.30143e-08	1.70156e-06
5899	RALB	v-ral simian leukemia viral oncogene homolog B	7.64457	7.6049	7.67928	8.32437	8.32573	8.42542	1.64215	0.71559	1.64215	up	5.42816e-10	5.99507e-08
5062	PAK2	p21 protein (Cdc42/Rac)-activated kinase 2	7.29761	7.28668	7.24513	6.03908	6.10627	6.11959	-2.27862	-1.18816	2.27862	down	9.1872e-12	3.92633e-09
55916	NXT2	nuclear transport factor 2-like export factor 2	4.94308	5.17594	5.04766	4.30507	3.98361	4.05507	-1.91983	-0.940977	1.91983	down	2.60185e-07	5.65816e-06
84896	ATAD1	ATPase family, AAA domain containing 1	8.33876	8.40752	8.27628	9.03625	9.00885	8.86339	1.54611	0.628643	1.54611	up	1.0522e-08	5.22353e-07
6809	STX3	syntaxin 3	8.53075	8.4774	8.45786	7.65748	7.63011	7.57015	-1.82693	-0.869423	1.82693	down	2.66104e-11	7.75012e-09
10138	YAF2	YY1 associated factor 2	6.1486	6.12786	6.27294	5.50025	5.42013	5.48867	-1.63972	-0.71345	1.63972	down	8.65872e-08	2.4652e-06
1460	CSNK2B	casein kinase 2, beta polypeptide	4.26755	4.11986	4.40213	5.29752	5.01799	5.16206	1.86091	0.89601	1.86091	up	3.57059e-07	7.26908e-06
10314	LANCL1	LanC lantibiotic synthetase component C-like 1 (bacterial)	7.45655	7.76051	7.74495	8.39844	8.27527	8.35708	1.61283	0.689593	1.61283	up	1.88767e-07	4.4496e-06
7082	TJP1	tight junction protein 1	9.37023	9.36231	9.35378	8.68518	8.67463	8.65957	-1.61214	-0.68898	1.61214	down	1.71246e-11	6.05903e-09
84836	ABHD14B	abhydrolase domain containing 14B	7.45811	7.51481	7.4575	6.26702	6.50585	6.3126	-2.16593	-1.11498	2.16593	down	1.86424e-10	2.87444e-08
84333	PCGF5	polycomb group ring finger 5	6.3784	6.18488	6.51578	5.82167	5.7815	5.67845	-1.51482	-0.599147	1.51482	down	5.82626e-06	6.61881e-05
50861	STMN3	stathmin 3	7.61106	7.66415	7.6094	8.51215	8.63279	8.43615	1.86455	0.898827	1.86455	up	1.44652e-10	2.42513e-08
3673	ITGA2	integrin, alpha 2 (CD49B, alpha 2 subunit of VLA-2 receptor)	6.63498	6.84559	6.92566	7.58534	7.24986	7.32924	1.50115	0.58607	1.50115	up	1.33714e-05	0.000128605
79762	C1orf115	chromosome 1 open reading frame 115	6.97884	6.83791	6.9239	7.51079	7.5942	7.5689	1.5631	0.644413	1.5631	up	1.50106e-08	6.65744e-07
2589	GALNT1	polypeptide N-acetylgalactosaminyltransferase 1	7.10683	7.12081	6.96199	7.61352	7.71924	7.69482	1.52907	0.61265	1.52907	up	4.91803e-08	1.61383e-06
653590	GGTLC5P	gamma-glutamyltransferase light chain 5 pseudogene	5.92034	5.76946	5.74232	5.01344	5.29668	5.31585	-1.51787	-0.60205	1.51787	down	1.34655e-05	0.00012932
5906	RAP1A	RAP1A, member of RAS oncogene family	12.6854	12.6275	12.595	13.3445	13.3896	13.3425	1.65052	0.722917	1.65052	up	2.54113e-13	3.12226e-10
8412	BCAR3	breast cancer anti-estrogen resistance 3	5.70263	5.9943	5.79358	5.25768	4.9714	5.28883	-1.57738	-0.657533	1.57738	down	1.32828e-05	0.000127815
1583	CYP11A1	cytochrome P450, family 11, subfamily A, polypeptide 1	4.84268	4.79655	4.90308	3.86807	3.74402	3.62516	-2.14605	-1.10169	2.14605	down	8.64953e-09	4.4925e-07
401509	ZNF658B	zinc finger protein 658B, pseudogene	5.15015	5.75617	5.58883	6.09075	6.11541	6.09502	1.51783	0.60201	1.51783	up	0.000182305	0.00110769
889	KRIT1	KRIT1, ankyrin repeat containing	5.92132	5.86399	5.94799	6.69118	6.47839	6.44579	1.54473	0.627353	1.54473	up	8.10904e-07	1.3878e-05
84945	ABHD13	abhydrolase domain containing 13	5.08799	5.38677	5.34141	4.4655	4.55594	4.59681	-1.66168	-0.73264	1.66168	down	1.65926e-06	2.42523e-05
9958	USP15	ubiquitin specific peptidase 15	5.99228	5.9659	5.86945	5.05232	5.18358	5.17256	-1.74883	-0.80639	1.74883	down	3.9221e-08	1.35867e-06
833	CARS	cysteinyl-tRNA synthetase	7.94883	7.9459	7.90303	7.01766	7.03354	7.01858	-1.87817	-0.909327	1.87817	down	2.24219e-11	7.05266e-09
3796	KIF2A	kinesin heavy chain member 2A	7.50749	7.42448	7.55736	6.8173	6.94062	6.8352	-1.54979	-0.63207	1.54979	down	3.24647e-08	1.17529e-06
127703	C1orf216	chromosome 1 open reading frame 216	7.06147	7.12434	6.98012	7.55119	7.70563	7.71405	1.51745	0.601647	1.51745	up	1.05753e-07	2.87314e-06
728833	FAM72D	family with sequence similarity 72 member D	7.88685	7.89132	7.86845	7.28342	7.26985	7.11206	-1.58055	-0.66043	1.58055	down	1.05411e-08	5.22643e-07
5049	PAFAH1B2	platelet activating factor acetylhydrolase 1b catalytic subunit 2	9.25874	9.15977	9.14455	8.33023	8.41524	8.32904	-1.77709	-0.829517	1.77709	down	3.8941e-11	1.02072e-08
4233	MET	MET proto-oncogene, receptor tyrosine kinase	4.59416	4.76671	4.72332	3.78366	3.72146	3.67754	-1.95501	-0.967177	1.95501	down	2.57381e-08	9.99973e-07
11342	RNF13	ring finger protein 13	7.63479	7.60617	7.5641	8.49146	8.55963	8.52263	1.8959	0.922887	1.8959	up	8.50457e-12	3.75711e-09
51030	TVP23B	trans-golgi network vesicle protein 23 homolog B (S. cerevisiae)	9.3253	9.43329	9.42593	8.4017	8.32008	8.34733	-2.05405	-1.03847	2.05405	down	1.30956e-12	1.0508e-09
129790	C7orf13	chromosome 7 open reading frame 13	6.26376	5.88906	6.0277	6.67014	6.59527	6.72572	1.51944	0.603537	1.51944	up	6.87103e-06	7.55679e-05
23235	SIK2	salt inducible kinase 2	6.62648	6.41919	6.4704	6.96713	7.25838	7.12915	1.52929	0.612863	1.52929	up	2.01076e-06	2.83366e-05
387263	C6orf120	chromosome 6 open reading frame 120	7.65347	7.87219	7.8369	8.7711	8.57807	8.67619	1.8501	0.8876	1.8501	up	1.7312e-09	1.37233e-07
79844	ZDHHC11	zinc finger, DHHC-type containing 11	5.60756	5.72297	5.81605	5.04258	5.25925	4.97591	-1.54002	-0.622947	1.54002	down	7.38336e-06	7.99501e-05
771	CA12	carbonic anhydrase XII	6.80993	6.71225	6.83436	5.94826	6.30634	6.18476	-1.55731	-0.63906	1.55731	down	2.6647e-06	3.56241e-05
5270	SERPINE2	serpin peptidase inhibitor, clade E (nexin, plasminogen activator inhibitor type 1), member 2	4.2016	4.14716	3.87821	3.45979	3.56005	3.35333	-1.53468	-0.617933	1.53468	down	3.73943e-05	0.000298532
23764	MAFF	v-maf avian musculoaponeurotic fibrosarcoma oncogene homolog F	7.94506	7.96774	7.91392	7.35636	7.35148	7.26457	-1.53486	-0.618103	1.53486	down	4.64863e-09	2.84185e-07
59	ACTA2	actin, alpha 2, smooth muscle, aorta	6.12958	5.86446	6.18861	6.91056	6.82358	6.93272	1.77531	0.82807	1.77531	up	9.3057e-08	2.59453e-06
26190	FBXW2	F-box and WD repeat domain containing 2	6.23732	6.33654	6.47379	5.72682	5.52982	5.86441	-1.56071	-0.6422	1.56071	down	5.7007e-06	6.50624e-05
78988	MRPL57	mitochondrial ribosomal protein L57	4.31816	4.47001	4.4918	5.10903	5.12572	5.07977	1.60012	0.678183	1.60012	up	8.40085e-07	1.42377e-05
83448	PUS7L	pseudouridylate synthase 7-like	6.81891	6.81995	6.76397	6.00949	6.16222	6.13216	-1.62411	-0.699653	1.62411	down	3.06329e-08	1.13304e-06
323	APBB2	amyloid beta (A4) precursor protein-binding, family B, member 2	5.45299	5.44643	5.53388	4.81404	4.84711	4.96702	-1.51751	-0.60171	1.51751	down	1.858e-06	2.65744e-05
51232	CRIM1	cysteine rich transmembrane BMP regulator 1 (chordin-like)	8.55687	8.55297	8.55028	7.9288	7.92481	7.89495	-1.55529	-0.637187	1.55529	down	2.84399e-10	3.88169e-08
23450	SF3B3	splicing factor 3b subunit 3	6.33558	6.41139	6.25248	5.62413	5.78918	5.81129	-1.50693	-0.591617	1.50693	down	1.51472e-06	2.25762e-05
10935	PRDX3	peroxiredoxin 3	10.4774	10.4259	10.4098	9.182	9.27954	9.18829	-2.33122	-1.22108	2.33122	down	2.42002e-14	5.00791e-11
100527950	GJA9-MYCBP	GJA9-MYCBP readthrough	7.77501	7.75533	7.79452	8.55039	8.43401	8.3573	1.59359	0.67228	1.59359	up	4.14031e-09	2.57577e-07
79188	TMEM43	transmembrane protein 43	8.31528	8.34052	8.35953	9.26328	9.1558	9.19588	1.82329	0.866543	1.82329	up	7.28094e-12	3.42982e-09
55212	BBS7	Bardet-Biedl syndrome 7	5.58499	5.69189	5.42213	6.30692	6.21219	6.30403	1.63359	0.708043	1.63359	up	3.74252e-07	7.5422e-06
1241	LTB4R	leukotriene B4 receptor	6.40874	6.56585	6.54015	5.62619	5.5853	5.63294	-1.85331	-0.890103	1.85331	down	3.64345e-09	2.36391e-07
4312	MMP1	matrix metallopeptidase 1	6.31258	6.22249	6.18261	6.91295	7.09934	7.00813	1.70241	0.76758	1.70241	up	1.72542e-08	7.44677e-07
7779	SLC30A1	solute carrier family 30 (zinc transporter), member 1	6.57609	6.6725	6.48202	7.1373	7.23828	7.17691	1.5234	0.607293	1.5234	up	1.4505e-07	3.65113e-06
60686	C14orf93	chromosome 14 open reading frame 93	7.21115	7.03898	7.04684	6.3853	6.6258	6.50788	-1.50803	-0.592663	1.50803	down	1.14763e-06	1.8136e-05
23788	MTCH2	mitochondrial carrier 2	7.67706	7.7274	7.82655	7.03569	7.17204	7.03569	-1.58286	-0.66253	1.58286	down	2.25138e-08	9.08826e-07
50999	TMED5	transmembrane p24 trafficking protein 5	7.11889	7.25874	7.27438	6.54099	6.51048	6.47852	-1.63279	-0.70734	1.63279	down	1.33587e-08	6.12976e-07
10982	MAPRE2	microtubule associated protein RP/EB family member 2	5.59993	5.58097	5.38057	6.10395	6.14589	6.10874	1.5147	0.599037	1.5147	up	1.54783e-06	2.29565e-05
80127	BBOF1	basal body orientation factor 1	4.99271	4.56034	4.17105	5.37486	5.34662	5.26417	1.68629	0.75385	1.68629	up	0.000215671	0.00127152
126298	IRGQ	immunity-related GTPase family, Q	6.37504	6.6494	6.44763	7.12092	7.1084	7.10334	1.53708	0.620197	1.53708	up	4.43274e-07	8.64088e-06
8969	HIST1H2AG	histone cluster 1, H2ag	4.41177	4.91776	4.46012	6.0214	6.07247	5.91984	2.65373	1.40802	2.65373	up	1.25238e-08	5.87604e-07
49854	ZBTB21	zinc finger and BTB domain containing 21	7.31076	7.22853	7.33398	6.48658	6.51073	6.43623	-1.75716	-0.813243	1.75716	down	1.06155e-09	9.57272e-08
1848	DUSP6	dual specificity phosphatase 6	10.3252	10.5116	10.6424	11.2026	11.0641	11.1482	1.56393	0.645177	1.56393	up	7.45113e-08	2.19943e-06
10608	MXD4	MAX dimerization protein 4	7.60342	7.42798	7.43606	8.07098	8.28955	8.16296	1.60808	0.685343	1.60808	up	4.90646e-08	1.61298e-06
51552	RAB14	RAB14, member RAS oncogene family	4.47488	4.76964	4.68204	5.28287	5.12891	5.31109	1.51442	0.59877	1.51442	up	1.62078e-05	0.00015025
83440	ADPGK	ADP-dependent glucokinase	6.3406	6.49588	6.40381	6.94113	7.08916	7.05086	1.53009	0.61362	1.53009	up	1.78677e-07	4.27064e-06
8869	ST3GAL5	ST3 beta-galactoside alpha-2,3-sialyltransferase 5	7.22009	7.14332	7.04633	6.33101	6.53516	6.70058	-1.53085	-0.61433	1.53085	down	4.2167e-06	5.11864e-05
93	ACVR2B	activin A receptor type IIB	7.17319	7.21301	7.23527	8.18365	8.12444	8.0919	1.90023	0.926173	1.90023	up	2.42842e-11	7.35923e-09
203228	C9orf72	chromosome 9 open reading frame 72	5.05563	4.88327	5.05635	4.25449	4.3973	4.47724	-1.53909	-0.622073	1.53909	down	6.86359e-06	7.55283e-05
7905	REEP5	receptor accessory protein 5	6.95232	7.0848	7.08771	7.72929	7.65055	7.61229	1.53947	0.622433	1.53947	up	3.24864e-08	1.17529e-06
1948	EFNB2	ephrin-B2	9.49997	9.54085	9.57428	10.6501	10.5429	10.5947	2.08136	1.05752	2.08136	up	1.17202e-13	1.68485e-10
493	ATP2B4	ATPase, Ca++ transporting, plasma membrane 4	7.40848	7.44975	7.50677	8.38754	8.25598	8.28234	1.80703	0.85362	1.80703	up	1.51524e-10	2.49273e-08
4734	NEDD4	neural precursor cell expressed, developmentally down-regulated 4, E3 ubiquitin protein ligase	6.22544	6.4564	6.2886	7.1603	6.98425	6.96932	1.64089	0.714477	1.64089	up	1.87552e-07	4.42363e-06
102725241	LOC102725241	putative neutral ceramidase C	5.33828	4.94273	5.13857	5.7108	5.856	5.68015	1.52533	0.609123	1.52533	up	2.31414e-05	0.000200855
6804	STX1A	syntaxin 1A	5.45642	5.3787	4.98658	6.12782	6.21538	6.18678	1.86964	0.90276	1.86964	up	6.98375e-07	1.23188e-05
3920	LAMP2	lysosomal-associated membrane protein 2	4.46117	4.35976	4.19646	5.24202	5.06103	5.12179	1.7441	0.802483	1.7441	up	5.07055e-07	9.61513e-06
80218	NAA50	N(alpha)-acetyltransferase 50, NatE catalytic subunit	9.04954	9.10756	9.07795	8.27847	8.23457	8.23475	-1.77656	-0.829087	1.77656	down	6.47395e-12	3.1425e-09
55034	MOCOS	molybdenum cofactor sulfurase	8.38129	8.35283	8.36318	7.68406	7.82709	7.77774	-1.51866	-0.602803	1.51866	down	5.16449e-09	3.04891e-07
8345	HIST1H2BH	histone cluster 1, H2bh	7.24066	7.20969	7.20299	6.31667	6.46572	6.33295	-1.79751	-0.846	1.79751	down	1.33513e-09	1.1338e-07
55756	INTS9	integrator complex subunit 9	6.34417	6.22249	6.25339	6.92327	6.96096	6.78289	1.53229	0.61569	1.53229	up	2.45745e-07	5.43432e-06
340481	ZDHHC21	zinc finger, DHHC-type containing 21	4.81525	4.76411	4.39814	5.32814	5.27971	5.23063	1.53722	0.620327	1.53722	up	3.6547e-05	0.0002932
6651	SON	SON DNA binding protein	9.88959	9.88169	9.97324	9.20902	9.16637	9.1683	-1.66279	-0.73361	1.66279	down	1.5133e-11	5.61319e-09
100529097	RPL36A-HNRNPH2	RPL36A-HNRNPH2 readthrough	9.42217	9.49581	9.50043	8.99071	8.73282	8.82751	-1.53949	-0.622457	1.53949	down	2.97586e-08	1.11859e-06
653820	FAM72B	family with sequence similarity 72 member B	7.88685	7.89132	7.86845	7.28342	7.26985	7.11206	-1.58055	-0.66043	1.58055	down	1.05411e-08	5.22643e-07
11334	TUSC2	tumor suppressor candidate 2	7.36744	7.36535	7.27735	7.99413	8.04877	7.95415	1.58261	0.662303	1.58261	up	2.82697e-09	1.97631e-07
56129	PCDHB7	protocadherin beta 7	5.89344	5.94654	5.87049	6.4477	6.59639	6.47259	1.51789	0.60207	1.51789	up	3.08073e-07	6.47051e-06
146198	ZFP90	ZFP90 zinc finger protein	6.90876	6.70961	6.73741	7.41666	7.36096	7.33616	1.50108	0.586	1.50108	up	2.09385e-07	4.80596e-06
56288	PARD3	par-3 family cell polarity regulator	5.19082	5.29166	5.26057	5.88443	5.77502	5.89326	1.5191	0.60322	1.5191	up	8.62555e-07	1.44684e-05
123606	NIPA1	non imprinted in Prader-Willi/Angelman syndrome 1	6.91024	7.10148	7.08682	6.12207	6.25241	6.28837	-1.75552	-0.811897	1.75552	down	1.97944e-08	8.24444e-07
4092	SMAD7	SMAD family member 7	4.83148	4.82549	4.57339	5.7831	5.90117	5.73187	2.08772	1.06193	2.08772	up	1.36801e-08	6.20936e-07
7358	UGDH	UDP-glucose 6-dehydrogenase	7.55081	7.75397	7.85485	8.44607	8.27917	8.34881	1.55632	0.63814	1.55632	up	3.44256e-07	7.05706e-06
9939	RBM8A	RNA binding motif protein 8A	5.6572	5.72574	5.76028	5.08861	5.12819	5.10725	-1.52244	-0.60639	1.52244	down	6.40321e-07	1.15593e-05
22998	LIMCH1	LIM and calponin homology domains 1	5.91045	6.17179	5.87323	5.39884	5.45413	5.33046	-1.50596	-0.59068	1.50596	down	8.11237e-06	8.6346e-05
950	SCARB2	scavenger receptor class B, member 2	6.16605	6.27824	6.23498	7.2008	6.69056	6.89954	1.62888	0.703877	1.62888	up	7.17182e-06	7.81525e-05
57209	ZNF248	zinc finger protein 248	5.5888	5.50493	5.70393	6.45934	6.59877	6.54207	1.9108	0.934173	1.9108	up	5.21937e-09	3.07669e-07
51026	GOLT1B	golgi transport 1B	8.08335	8.12433	8.09948	7.43652	7.43479	7.43981	-1.58595	-0.665347	1.58595	down	5.16115e-10	5.79789e-08
79027	ZNF655	zinc finger protein 655	6.68687	6.89752	6.61504	7.43983	7.45053	7.39205	1.61813	0.694327	1.61813	up	1.09311e-07	2.94176e-06
2590	GALNT2	polypeptide N-acetylgalactosaminyltransferase 2	4.81427	4.69795	4.77608	5.34849	5.51855	5.42441	1.58856	0.667717	1.58856	up	7.72051e-07	1.33408e-05
54901	CDKAL1	CDK5 regulatory subunit associated protein 1-like 1	4.4396	4.61334	4.61567	5.32814	5.11456	5.29281	1.61213	0.688967	1.61213	up	1.96563e-06	2.78503e-05
56650	CLDND1	claudin domain containing 1	9.14229	9.08836	9.14941	8.04022	8.12931	8.16838	-2.01957	-1.01405	2.01957	down	2.72245e-12	1.72647e-09
27230	SERP1	stress-associated endoplasmic reticulum protein 1	8.75597	8.71816	8.78103	9.55717	9.4212	9.49442	1.66926	0.73921	1.66926	up	8.0464e-11	1.68281e-08
11168	PSIP1	PC4 and SFRS1 interacting protein 1	9.5332	9.56901	9.61874	8.65286	8.58479	8.59219	-1.95031	-0.963703	1.95031	down	9.71488e-13	8.75694e-10
85455	DISP2	dispatched homolog 2 (Drosophila)	4.74721	4.5557	4.62833	5.37027	5.29758	5.39396	1.63602	0.71019	1.63602	up	4.76894e-07	9.14213e-06
57826	RAP2C	RAP2C, member of RAS oncogene family	8.12643	8.04188	8.04015	7.06008	7.18227	7.15824	-1.91316	-0.935957	1.91316	down	6.54125e-11	1.50403e-08
55711	FAR2	fatty acyl-CoA reductase 2	6.58011	6.52625	6.66539	5.91734	5.95528	5.86946	-1.59832	-0.676557	1.59832	down	6.02681e-08	1.87174e-06
55629	PNRC2	proline rich nuclear receptor coactivator 2	9.09093	9.24255	9.24563	10.0053	9.76876	9.82555	1.59494	0.6735	1.59494	up	2.06803e-08	8.53209e-07
51144	HSD17B12	hydroxysteroid (17-beta) dehydrogenase 12	9.83492	9.79906	9.82417	9.04344	9.15251	9.08553	-1.65354	-0.725557	1.65354	down	2.23946e-11	7.05266e-09
220930	ZEB1-AS1	ZEB1 antisense RNA 1	6.25577	6.19011	6.25769	7.19348	7.22759	7.19916	1.96186	0.97222	1.96186	up	9.05714e-11	1.78549e-08
57724	EPG5	ectopic P-granules autophagy protein 5 homolog (C. elegans)	6.75676	6.58497	6.58537	7.24663	7.25279	7.22006	1.51305	0.59746	1.51305	up	1.21849e-07	3.19788e-06
56937	PMEPA1	prostate transmembrane protein, androgen induced 1	4.26129	4.05677	4.15629	4.62387	4.95199	4.90066	1.5882	0.66739	1.5882	up	1.21268e-05	0.000118992
9801	MRPL19	mitochondrial ribosomal protein L19	7.47974	7.45142	7.46581	6.81774	6.9496	6.74826	-1.54448	-0.627123	1.54448	down	5.21192e-08	1.67969e-06
117584	RFFL	ring finger and FYVE-like domain containing E3 ubiquitin protein ligase	8.68881	8.83911	8.88719	8.17277	8.00331	7.95697	-1.6943	-0.760687	1.6943	down	1.07845e-08	5.30695e-07
22996	TTC39A	tetratricopeptide repeat domain 39A	4.47488	4.13244	4.5978	3.51567	3.96852	3.77401	-1.56805	-0.648973	1.56805	down	0.00024382	0.00141118
3292	HSD17B1	hydroxysteroid (17-beta) dehydrogenase 1	8.75811	8.76898	8.69062	8.0449	8.21676	8.10317	-1.53435	-0.617627	1.53435	down	6.87224e-09	3.81642e-07
653308	ASAH2B	N-acylsphingosine amidohydrolase (non-lysosomal ceramidase) 2B	5.33828	4.94273	5.13857	5.7108	5.856	5.68015	1.52533	0.609123	1.52533	up	2.31414e-05	0.000200855
2878	GPX3	glutathione peroxidase 3	6.00848	6.00562	5.86569	5.18356	5.31802	5.07671	-1.70192	-0.767167	1.70192	down	2.32203e-07	5.19541e-06
55745	AP5M1	adaptor-related protein complex 5, mu 1 subunit	6.60987	6.71528	6.6559	7.36491	7.25633	7.25941	1.551	0.6332	1.551	up	2.94607e-08	1.11058e-06
3371	TNC	tenascin C	7.12174	7.20872	7.18314	6.32489	6.43315	6.38322	-1.73001	-0.79078	1.73001	down	2.10377e-09	1.5846e-07
54677	CROT	carnitine O-octanoyltransferase	5.00706	5.19683	4.9757	6.06976	5.99749	6.09036	1.98987	0.992673	1.98987	up	6.82677e-09	3.79653e-07
9111	NMI	N-myc and STAT interactor	6.35763	6.28779	6.27217	6.91295	6.97157	6.94159	1.5542	0.636173	1.5542	up	2.86738e-08	1.08717e-06
55334	SLC39A9	solute carrier family 39, member 9	6.37366	6.38687	6.39432	5.42604	5.66606	5.74229	-1.7094	-0.773487	1.7094	down	2.15866e-07	4.90953e-06
10381	TUBB3	tubulin, beta 3 class III	7.96885	7.96085	7.78477	8.65704	8.73272	8.66867	1.7187	0.78132	1.7187	up	9.58594e-10	8.84742e-08
1305	COL13A1	collagen, type XIII, alpha 1	5.63175	5.54759	5.50427	4.44881	4.59381	4.55953	-2.038	-1.02715	2.038	down	4.45045e-09	2.72984e-07
6642	SNX1	sorting nexin 1	7.95771	7.87698	7.91098	8.49905	8.54701	8.48626	1.51105	0.59555	1.51105	up	1.7757e-09	1.39356e-07
339318	ZNF181	zinc finger protein 181	4.51386	4.68816	4.55569	5.28549	5.38586	5.30791	1.67077	0.740517	1.67077	up	2.85975e-07	6.0877e-06
2872	MKNK2	MAP kinase interacting serine/threonine kinase 2	7.60919	7.68186	7.67482	8.29591	8.24062	8.38447	1.57103	0.65171	1.57103	up	3.3881e-09	2.22393e-07
91612	CHURC1	churchill domain containing 1	5.6009	5.81178	5.6955	6.51315	6.40715	6.4687	1.69381	0.760273	1.69381	up	5.54852e-08	1.75989e-06
100507399	HCG8	HLA complex group 8	4.87393	4.90066	4.61334	5.52539	5.3221	5.43328	1.54858	0.630947	1.54858	up	9.96037e-06	0.000102144
259230	SGMS1	sphingomyelin synthase 1	5.66156	5.95604	6.01653	6.86207	6.65919	6.69622	1.81644	0.861117	1.81644	up	2.38194e-07	5.30011e-06
54480	CHPF2	chondroitin polymerizing factor 2	8.3597	8.32944	8.18772	8.8692	8.98644	8.88481	1.53815	0.621197	1.53815	up	1.14996e-08	5.55949e-07
339324	ZNF260	zinc finger protein 260	5.01216	5.00114	4.78331	5.88758	5.67011	5.65368	1.74705	0.80492	1.74705	up	4.89371e-07	9.34942e-06
2970	GTF2IP1	general transcription factor IIi pseudogene 1	7.39	7.25527	7.31592	7.95909	7.8745	7.91603	1.51167	0.596143	1.51167	up	1.65834e-08	7.22066e-07
9110	MTMR4	myotubularin related protein 4	8.176	8.20778	8.17951	7.45671	7.44186	7.47081	-1.66014	-0.731303	1.66014	down	1.4154e-10	2.40911e-08
84264	HAGHL	hydroxyacylglutathione hydrolase-like	9.35358	9.19848	9.15335	8.49884	8.76599	8.6553	-1.51057	-0.595093	1.51057	down	3.35548e-07	6.91461e-06
9500	MAGED1	MAGE family member D1	10.1027	10.0579	10.0433	9.33912	9.46509	9.36415	-1.60052	-0.678543	1.60052	down	9.81738e-11	1.87379e-08
3028	HSD17B10	hydroxysteroid (17-beta) dehydrogenase 10	9.21109	9.15904	9.01898	9.73336	9.87794	9.74344	1.57485	0.65521	1.57485	up	7.27554e-09	3.98412e-07
54756	IL17RD	interleukin 17 receptor D	7.34504	7.37453	7.36276	6.28268	6.22411	6.36168	-2.10131	-1.07129	2.10131	down	4.10694e-11	1.06114e-08
10938	EHD1	EH domain containing 1	8.31708	8.26198	8.22161	8.81412	9.00883	8.95499	1.57909	0.65909	1.57909	up	5.49133e-09	3.20339e-07
10054	UBA2	ubiquitin-like modifier activating enzyme 2	8.40709	8.43074	8.4445	7.79854	7.74617	7.76439	-1.57761	-0.657743	1.57761	down	3.50531e-10	4.4893e-08
10484	SEC23A	Sec23 homolog A, COPII coat complex component	9.63873	9.70761	9.65632	8.45039	8.25348	8.29897	-2.51974	-1.33327	2.51974	down	3.92327e-13	4.16905e-10
677800	SNORA12	small nucleolar RNA, H/ACA box 12	6.53866	6.56616	6.57226	7.61496	7.61239	7.4604	2.00494	1.00356	2.00494	up	1.10783e-10	2.00726e-08
10628	TXNIP	thioredoxin interacting protein	8.74895	8.72002	8.59746	10.4617	10.5725	10.4648	3.50849	1.81085	3.50849	up	2.50822e-15	9.86183e-12
8030	CCDC6	coiled-coil domain containing 6	9.4794	9.51425	9.48153	8.72246	8.77083	8.79635	-1.65693	-0.728513	1.65693	down	1.61833e-11	5.78452e-09
154796	AMOT	angiomotin	5.11017	5.00837	5.13661	4.23559	4.00427	4.26077	-1.88972	-0.918173	1.88972	down	1.01894e-07	2.78988e-06
85236	HIST1H2BK	histone cluster 1, H2bk	8.773	8.68086	8.76906	9.77115	9.77474	9.74255	2.03051	1.02184	2.03051	up	3.12699e-13	3.72567e-10
25917	THUMPD3	THUMP domain containing 3	7.52713	7.49832	7.45484	6.70425	6.61927	6.52112	-1.83853	-0.87855	1.83853	down	8.26007e-10	8.07884e-08
91860	CALML4	calmodulin like 4	6.83131	6.74875	6.67017	5.90891	5.89073	5.73259	-1.87384	-0.906	1.87384	down	5.86126e-09	3.35431e-07
100288152	LOC100288152	uncharacterized LOC100288152	6.63911	6.51302	6.43389	5.80332	5.95145	5.87485	-1.57149	-0.652133	1.57149	down	3.64455e-07	7.3788e-06
2967	GTF2H3	general transcription factor IIH subunit 3	5.74252	5.70736	5.67012	6.28556	6.38827	6.26274	1.52153	0.605523	1.52153	up	3.10846e-07	6.51468e-06
26579	MYEOV	myeloma overexpressed	7.78202	7.74891	7.71721	9.07607	9.11133	9.05244	2.51501	1.33057	2.51501	up	2.86389e-14	5.63013e-11
22906	TRAK1	trafficking protein, kinesin binding 1	6.29198	6.24951	6.23596	6.96131	7.11635	6.97243	1.69061	0.757547	1.69061	up	9.08777e-09	4.683e-07
56262	LRRC8A	leucine-rich repeat containing 8 family member A	9.94228	9.95133	9.87903	10.5665	10.6101	10.528	1.56265	0.643993	1.56265	up	3.12725e-11	8.85875e-09
283464	GXYLT1	glucoside xylosyltransferase 1	5.97546	6.16246	6.19091	4.70618	5.16327	5.02962	-2.20879	-1.14325	2.20879	down	6.15897e-08	1.90376e-06
9367	RAB9A	RAB9A, member RAS oncogene family	7.88068	7.95524	7.83318	7.1087	7.33652	7.18881	-1.60032	-0.678357	1.60032	down	3.54438e-08	1.25548e-06
5208	PFKFB2	6-phosphofructo-2-kinase/fructose-2,6-biphosphatase 2	6.7442	6.92168	6.89961	6.14672	6.30891	6.11916	-1.58399	-0.663567	1.58399	down	2.84883e-07	6.06774e-06
27074	LAMP3	lysosomal-associated membrane protein 3	6.52523	6.55677	6.56182	4.85965	5.25057	5.3091	-2.654	-1.40817	2.654	down	2.23952e-09	1.65514e-07
6921	TCEB1	transcription elongation factor B (SIII), polypeptide 1 (15kDa, elongin C)	8.01021	7.95936	7.89135	7.224	7.34496	7.29199	-1.58739	-0.666657	1.58739	down	5.24261e-09	3.08115e-07
285521	COX18	COX18 cytochrome c oxidase assembly factor	8.28742	8.20893	8.14886	7.32561	7.57935	7.38884	-1.72166	-0.783803	1.72166	down	1.03951e-08	5.18675e-07
5793	PTPRG	protein tyrosine phosphatase, receptor type, G	6.95237	7.02375	7.09525	5.90981	5.85339	5.77628	-2.26153	-1.1773	2.26153	down	6.73663e-11	1.51498e-08
26127	FGFR1OP2	FGFR1 oncogene partner 2	5.69131	5.87029	5.93599	5.03492	5.23462	4.98432	-1.67936	-0.74791	1.67936	down	9.88709e-07	1.61081e-05
411	ARSB	arylsulfatase B	4.58589	4.70668	4.74821	5.67634	5.29265	5.60656	1.79617	0.844923	1.79617	up	9.30398e-07	1.53381e-05
23429	RYBP	RING1 and YY1 binding protein	8.68857	8.67108	8.62822	7.8305	7.9998	8.01987	-1.63872	-0.712567	1.63872	down	2.51986e-09	1.81126e-07
84455	EFCAB7	EF-hand calcium binding domain 7	4.82732	4.84852	4.7392	5.56494	5.33411	5.43004	1.55619	0.638017	1.55619	up	2.17293e-06	3.01678e-05
3987	LIMS1	LIM and senescent cell antigen-like domains 1	7.32857	7.4136	7.45377	8.14298	7.97363	7.95423	1.54218	0.624967	1.54218	up	5.14872e-08	1.66615e-06
1606	DGKA	diacylglycerol kinase alpha	6.51348	6.60407	6.5514	5.60719	5.63136	5.64167	-1.90472	-0.929577	1.90472	down	8.40111e-10	8.13801e-08
4026	LPP	LIM domain containing preferred translocation partner in lipoma	4.21683	4.31923	4.48956	3.5722	3.71446	3.57805	-1.64753	-0.720303	1.64753	down	2.83391e-06	3.73403e-05
54849	DEF8	differentially expressed in FDCP 8 homolog (mouse)	9.24518	9.16902	9.19564	9.88084	9.86478	9.89053	1.59708	0.675437	1.59708	up	1.88905e-11	6.4029e-09
29946	SERTAD3	SERTA domain containing 3	7.77103	7.80098	7.82549	8.39604	8.45397	8.42007	1.54135	0.624193	1.54135	up	8.10022e-10	7.98206e-08
84376	HOOK3	hook microtubule-tethering protein 3	6.78828	6.86186	6.94062	6.24485	6.25317	6.03911	-1.60719	-0.684543	1.60719	down	2.14637e-07	4.89242e-06
2969	GTF2I	general transcription factor IIi	7.39	7.25527	7.31592	7.95909	7.8745	7.91603	1.51167	0.596143	1.51167	up	1.65834e-08	7.22066e-07
6542	SLC7A2	solute carrier family 7 (cationic amino acid transporter, y+ system), member 2	6.8684	6.91483	6.85303	6.10514	6.22984	6.10555	-1.66084	-0.73191	1.66084	down	1.23552e-08	5.84574e-07
51361	HOOK1	hook microtubule-tethering protein 1	4.42524	4.67765	4.57901	3.89757	3.89137	3.92658	-1.57512	-0.65546	1.57512	down	3.59256e-06	4.48362e-05
23474	ETHE1	ethylmalonic encephalopathy 1	9.03399	9.05126	9.02926	8.36746	8.4458	8.32197	-1.57982	-0.65976	1.57982	down	3.4012e-10	4.42809e-08
10808	HSPH1	heat shock protein family H (Hsp110) member 1	7.9246	7.99823	7.91759	7.27908	7.42712	7.3473	-1.51114	-0.59564	1.51114	down	2.10489e-08	8.62984e-07
92086	GGTLC1	gamma-glutamyltransferase light chain 1	5.92034	5.76946	5.74232	5.01344	5.29668	5.31585	-1.51787	-0.60205	1.51787	down	1.34655e-05	0.00012932
142891	SAMD8	sterile alpha motif domain containing 8	6.90214	7.02188	7.00353	6.08757	6.08295	6.14703	-1.82766	-0.87	1.82766	down	1.19259e-09	1.03282e-07
51454	GULP1	GULP, engulfment adaptor PTB domain containing 1	6.36506	6.81447	6.68718	7.5392	6.98336	7.15108	1.51815	0.60231	1.51815	up	0.000360878	0.00196371
56925	LXN	latexin	5.61617	5.35781	5.44147	6.28953	6.18029	6.32765	1.73388	0.794007	1.73388	up	1.26748e-07	3.28726e-06
331	XIAP	X-linked inhibitor of apoptosis, E3 ubiquitin protein ligase	5.2399	5.63493	5.6473	4.9492	4.68802	5.07113	-1.52055	-0.604593	1.52055	down	0.000186953	0.00113139
7485	WRB	tryptophan rich basic protein	8.73661	8.57895	8.61718	9.23906	9.19395	9.26849	1.50482	0.589587	1.50482	up	4.38772e-09	2.7029e-07
64332	NFKBIZ	nuclear factor of kappa light polypeptide gene enhancer in B-cells inhibitor, zeta	10.2721	10.2847	10.3072	9.45036	9.42698	9.42518	-1.80729	-0.853827	1.80729	down	2.32234e-13	2.94547e-10
51029	DESI2	desumoylating isopeptidase 2	9.70956	9.73874	9.7408	8.97933	8.96408	8.95514	-1.69762	-0.763517	1.69762	down	2.61855e-12	1.71594e-09
9497	SLC4A7	solute carrier family 4, sodium bicarbonate cotransporter, member 7	8.91467	8.97232	9.00307	9.65707	9.51153	9.50702	1.51067	0.595187	1.51067	up	3.90625e-09	2.49126e-07
56648	EIF5A2	eukaryotic translation initiation factor 5A2	5.41505	5.22098	5.40159	6.19153	6.26786	6.08254	1.78357	0.83477	1.78357	up	6.11097e-08	1.89339e-06
10643	IGF2BP3	insulin like growth factor 2 mRNA binding protein 3	9.87486	9.8942	9.86196	10.7452	10.6453	10.6862	1.75957	0.815227	1.75957	up	1.06307e-12	8.89316e-10
10282	BET1	Bet1 golgi vesicular membrane trafficking protein	8.56889	8.73225	8.63421	7.94884	7.70425	7.93428	-1.7203	-0.78266	1.7203	down	1.1991e-08	5.74253e-07
8091	HMGA2	high mobility group AT-hook 2	9.98622	9.9826	9.95781	11.0062	11.0182	11.0072	2.0491	1.03499	2.0491	up	4.73907e-15	1.33093e-11
22990	PCNX	pecanex homolog (Drosophila)	7.96008	7.89458	7.84891	7.1543	7.1247	7.19647	-1.6733	-0.7427	1.6733	down	7.83675e-10	7.76135e-08
5932	RBBP8	retinoblastoma binding protein 8	8.49447	8.56112	8.56607	7.62986	7.6494	7.65232	-1.86179	-0.896693	1.86179	down	8.9305e-12	3.85857e-09
7626	ZNF75D	zinc finger protein 75D	5.48667	5.46511	5.51324	6.05177	6.01935	6.14981	1.50035	0.585303	1.50035	up	6.51927e-07	1.17204e-05
388	RHOB	ras homolog family member B	7.65601	7.64096	7.60118	8.57556	8.62374	8.60705	1.95803	0.9694	1.95803	up	2.69183e-12	1.72647e-09
134429	STARD4	StAR related lipid transfer domain containing 4	7.37844	7.33474	7.47442	6.7696	6.69123	6.69206	-1.60018	-0.678237	1.60018	down	1.20933e-08	5.77176e-07
2630	GBAP1	glucosidase, beta, acid pseudogene 1	5.79278	5.71774	5.69779	6.34213	6.51843	6.36449	1.59355	0.672247	1.59355	up	1.82371e-07	4.3431e-06
54932	EXD3	exonuclease 3'-5' domain containing 3	8.5554	8.54198	8.50992	7.78111	7.86296	7.78762	-1.65313	-0.725203	1.65313	down	1.5813e-10	2.5471e-08
23607	CD2AP	CD2-associated protein	8.07395	8.24049	8.2025	9.05528	8.68123	8.79647	1.59329	0.672013	1.59329	up	6.41797e-07	1.15753e-05
9824	ARHGAP11A	Rho GTPase activating protein 11A	7.34877	7.20109	7.13411	6.50138	6.69205	6.63606	-1.53492	-0.61816	1.53492	down	4.67701e-07	8.99661e-06
114991	ZNF618	zinc finger protein 618	6.84092	6.66537	6.59562	7.2351	7.42544	7.27072	1.52603	0.609783	1.52603	up	8.5054e-07	1.43403e-05
7468	WHSC1	Wolf-Hirschhorn syndrome candidate 1	5.41776	5.87837	5.6896	6.62863	6.52625	6.59502	1.89394	0.92139	1.89394	up	2.32431e-07	5.19541e-06
130827	TMEM182	transmembrane protein 182	5.6656	5.82958	5.75987	5.09184	4.76531	5.03194	-1.72746	-0.788653	1.72746	down	7.66207e-07	1.32671e-05
10845	CLPX	caseinolytic mitochondrial matrix peptidase chaperone subunit	7.31248	7.4193	7.35557	6.62457	6.86612	6.6862	-1.5549	-0.63682	1.5549	down	1.86706e-07	4.41425e-06
6502	SKP2	S-phase kinase-associated protein 2, E3 ubiquitin protein ligase	4.25332	4.14451	4.13432	5.85099	5.73021	5.65671	2.96614	1.56859	2.96614	up	3.64998e-11	9.88448e-09
10802	SEC24A	SEC24 homolog A, COPII coat complex component	7.49779	7.38347	7.34907	6.32202	6.49727	6.34626	-2.03016	-1.02159	2.03016	down	4.19498e-10	5.05946e-08
993	CDC25A	cell division cycle 25A	5.43506	5.48645	5.41471	6.09738	6.05233	6.03641	1.53329	0.616633	1.53329	up	2.55335e-07	5.59602e-06
5002	SLC22A18	solute carrier family 22, member 18	7.62389	7.57296	7.52323	6.84287	6.91123	6.80887	-1.64608	-0.719037	1.64608	down	2.81684e-09	1.97631e-07
25939	SAMHD1	SAM domain and HD domain 1	6.04693	5.96898	5.90659	6.77157	6.80971	6.78673	1.75951	0.81517	1.75951	up	3.72778e-09	2.40277e-07
801	CALM1	calmodulin 1 (phosphorylase kinase, delta)	8.36013	8.43058	8.37868	7.70832	7.73454	7.74017	-1.58241	-0.66212	1.58241	down	4.37708e-10	5.21509e-08
10365	KLF2	Kruppel-like factor 2	7.58709	7.41551	7.50068	8.11169	8.13006	8.12156	1.53689	0.62001	1.53689	up	9.69724e-09	4.91335e-07
3275	PRMT2	protein arginine methyltransferase 2	5.5951	5.33486	5.49843	6.10802	6.22773	6.24486	1.64422	0.717407	1.64422	up	4.18374e-07	8.23718e-06
2137	EXTL3	exostosin-like glycosyltransferase 3	8.65149	8.60957	8.66462	7.97121	8.03588	7.97763	-1.56589	-0.646987	1.56589	down	4.07379e-10	4.94361e-08
51256	TBC1D7	TBC1 domain family member 7	6.55488	6.50149	6.53067	7.15103	7.2157	7.00502	1.51037	0.594903	1.51037	up	2.26615e-07	5.09349e-06
23657	SLC7A11	solute carrier family 7 (anionic amino acid transporter light chain, xc- system), member 11	4.88202	4.7165	4.50773	3.76574	3.97966	3.7649	-1.82174	-0.865317	1.82174	down	1.32461e-06	2.03362e-05
112770	GLMP	glycosylated lysosomal membrane protein	8.80992	8.72104	8.76302	9.3656	9.40622	9.42254	1.55128	0.63346	1.55128	up	1.78082e-10	2.76751e-08
8774	NAPG	N-ethylmaleimide-sensitive factor attachment protein, gamma	8.04533	7.93645	7.93791	7.1898	7.16087	7.01453	-1.80437	-0.851497	1.80437	down	9.56613e-10	8.84742e-08
133923	ZNF474	zinc finger protein 474	7.47347	7.44112	7.53893	6.54311	6.52982	6.50778	-1.94208	-0.957603	1.94208	down	6.79053e-11	1.51699e-08
100528030	POC1B-GALNT4	POC1B-GALNT4 readthrough	6.5822	6.74434	6.66263	7.33352	7.41134	7.40239	1.64645	0.71936	1.64645	up	8.08928e-09	4.30968e-07
8848	TSC22D1	TSC22 domain family member 1	9.32618	9.49048	9.51438	10.304	10.0852	10.1465	1.66425	0.73487	1.66425	up	6.34254e-09	3.55237e-07
256979	SUN3	Sad1 and UNC84 domain containing 3	8.00226	8.08783	8.00293	7.38945	7.44032	7.4787	-1.51032	-0.59485	1.51032	down	8.19211e-09	4.33213e-07
144195	SLC2A14	solute carrier family 2 (facilitated glucose transporter), member 14	6.97683	6.92062	6.84137	5.6459	5.97278	5.57971	-2.26599	-1.18014	2.26599	down	5.81259e-09	3.33633e-07
4351	MPI	mannose phosphate isomerase	6.03773	6.0662	5.75044	6.52625	6.58221	6.60688	1.53722	0.620323	1.53722	up	2.98243e-06	3.87903e-05
8459	TPST2	tyrosylprotein sulfotransferase 2	7.16974	7.15581	7.24755	6.56364	6.54413	6.53114	-1.56345	-0.64473	1.56345	down	1.30814e-08	6.07242e-07
642852	LOC642852	uncharacterized LOC642852	4.55818	5.16823	4.91356	6.02657	6.01903	6.1851	2.29248	1.19691	2.29248	up	1.79409e-07	4.28553e-06
54965	PIGX	phosphatidylinositol glycan anchor biosynthesis class X	7.72106	7.75999	7.79318	7.21185	7.15736	7.13049	-1.50682	-0.59151	1.50682	down	1.03534e-08	5.17906e-07
143279	HECTD2	HECT domain containing E3 ubiquitin protein ligase 2	6.7162	6.45445	6.56453	7.29123	7.23647	7.3058	1.62387	0.69944	1.62387	up	7.22533e-08	2.14566e-06
83931	STK40	serine/threonine kinase 40	7.73596	7.83925	7.92486	8.88239	8.83371	8.74995	1.98434	0.98866	1.98434	up	5.87926e-11	1.37596e-08
117247	SLC16A10	solute carrier family 16 (aromatic amino acid transporter), member 10	6.08616	5.90396	5.91127	6.89512	6.90822	6.92883	1.92331	0.943593	1.92331	up	1.35315e-09	1.1417e-07
5530	PPP3CA	protein phosphatase 3, catalytic subunit, alpha isozyme	6.17669	6.15658	6.08264	7.07016	7.21755	7.1879	2.02778	1.0199	2.02778	up	2.25094e-10	3.27787e-08
341	APOC1	apolipoprotein C-I	6.35508	6.30446	6.35204	5.68665	5.68986	5.54153	-1.62208	-0.697847	1.62208	down	8.30904e-08	2.38769e-06
9819	TSC22D2	TSC22 domain family member 2	7.57961	7.8813	7.68881	7.18733	7.11636	7.0463	-1.51562	-0.59991	1.51562	down	8.47515e-07	1.43077e-05
6815	STYX	serine/threonine/tyrosine interacting protein	5.40168	5.22485	5.26704	6.05691	6.08987	6.27004	1.79139	0.841083	1.79139	up	6.74948e-08	2.04732e-06
254251	LCORL	ligand dependent nuclear receptor corepressor like	7.42631	7.46637	7.41857	6.7055	6.79691	6.71889	-1.62074	-0.69665	1.62074	down	3.28391e-09	2.18102e-07
6882	TAF11	TATA-box binding protein associated factor 11	7.51789	7.64141	7.48505	8.2392	8.26661	8.17962	1.60254	0.68036	1.60254	up	3.81567e-09	2.45138e-07
6160	RPL31	ribosomal protein L31	8.80238	8.81219	8.78028	8.23105	8.18536	8.16249	-1.52131	-0.605317	1.52131	down	5.06724e-10	5.7416e-08
284323	ZNF780A	zinc finger protein 780A	4.66175	4.82341	4.57712	5.6106	5.42098	5.36556	1.71509	0.778287	1.71509	up	8.18755e-07	1.3965e-05
51473	DCDC2	doublecortin domain containing 2	4.73252	4.43243	4.46704	3.43332	3.53764	3.57234	-2.04141	-1.02956	2.04141	down	7.02028e-08	2.10384e-06
8723	SNX4	sorting nexin 4	7.73553	7.73361	7.70191	8.39894	8.38399	8.3428	1.57087	0.65156	1.57087	up	4.65521e-10	5.37036e-08
4905	NSF	N-ethylmaleimide-sensitive factor	6.62961	6.56774	6.44174	6.01507	6.00897	5.83781	-1.50777	-0.592413	1.50777	down	1.44242e-06	2.17208e-05
7832	BTG2	BTG family member 2	6.00617	6.01507	6.08239	6.86491	6.78553	6.98878	1.79651	0.845197	1.79651	up	6.24902e-09	3.50998e-07
6726	SRP9	signal recognition particle 9kDa	10.5266	10.5651	10.5067	9.65314	9.6893	9.65149	-1.8253	-0.868137	1.8253	down	2.27124e-13	2.94547e-10
8801	SUCLG2	succinate-CoA ligase, GDP-forming, beta subunit	9.07588	9.06398	8.99895	8.00264	8.14863	7.98019	-2.0034	-1.00245	2.0034	down	1.57629e-11	5.73858e-09
80315	CPEB4	cytoplasmic polyadenylation element binding protein 4	5.70322	5.78378	5.89259	6.46729	6.44539	6.30096	1.52769	0.61135	1.52769	up	1.00186e-06	1.6264e-05
51128	SAR1B	secretion associated, Ras related GTPase 1B	7.89591	7.96046	7.87245	5.48667	5.39965	5.3159	-5.69173	-2.50887	5.69173	down	2.25026e-15	9.86183e-12
55900	ZNF302	zinc finger protein 302	4.51386	4.68816	4.55569	5.28549	5.38586	5.30791	1.67077	0.740517	1.67077	up	2.85975e-07	6.0877e-06
728226	GGTLC3	gamma-glutamyltransferase light chain 3	5.92034	5.76946	5.74232	5.01344	5.29668	5.31585	-1.51787	-0.60205	1.51787	down	1.34655e-05	0.00012932
64786	TBC1D15	TBC1 domain family member 15	4.71637	4.79508	4.92001	4.40845	4.11781	4.12263	-1.50962	-0.59419	1.50962	down	3.27042e-05	0.000266998
6304	SATB1	SATB homeobox 1	8.1155	8.31894	8.37357	9.06219	8.94016	9.01898	1.6676	0.737773	1.6676	up	1.06133e-08	5.25559e-07
81577	GFOD2	glucose-fructose oxidoreductase domain containing 2	6.55574	6.36772	6.29036	7.09416	7.21621	7.12749	1.67174	0.741347	1.67174	up	7.57834e-08	2.22031e-06
124565	SLC38A10	solute carrier family 38, member 10	5.51874	5.42667	5.57612	6.28267	6.36641	6.32898	1.76399	0.818843	1.76399	up	1.28432e-08	5.99012e-07
92949	ADAMTSL1	ADAMTS like 1	5.25175	5.30707	5.51324	4.79725	4.47745	4.67463	-1.63306	-0.707577	1.63306	down	5.65976e-06	6.47644e-05
2629	GBA	glucosidase, beta, acid	5.79278	5.71774	5.69779	6.34213	6.51843	6.36449	1.59355	0.672247	1.59355	up	1.82371e-07	4.3431e-06
54928	IMPAD1	inositol monophosphatase domain containing 1	8.82113	8.80898	8.70371	8.13593	8.13239	7.99909	-1.61195	-0.688803	1.61195	down	2.21206e-09	1.64723e-07
56953	NT5M	5',3'-nucleotidase, mitochondrial	5.54765	5.51413	5.68665	4.86016	5.15015	4.71459	-1.59605	-0.67451	1.59605	down	1.55632e-05	0.000145417
101929530	FANCD2P2	Fanconi anemia complementation group D2 pseudogene 2	6.18747	6.31409	6.20504	5.56769	5.64344	5.51849	-1.57898	-0.658993	1.57898	down	2.07949e-07	4.78416e-06
5257	PHKB	phosphorylase kinase, beta	7.13266	7.14841	7.19002	7.81482	7.85105	7.81513	1.59104	0.66997	1.59104	up	1.25075e-09	1.07139e-07
5829	PXN	paxillin	7.6842	7.66881	7.8633	8.40828	8.35134	8.38724	1.56213	0.643517	1.56213	up	1.43061e-08	6.42107e-07
285989	ZNF789	zinc finger protein 789	5.4024	5.36667	5.24907	6.33231	6.27359	6.30998	1.9533	0.965913	1.9533	up	1.96932e-09	1.51016e-07
10966	RAB40B	RAB40B, member RAS oncogene family	8.20442	8.16828	8.15843	8.80952	8.80522	8.762	1.53177	0.615203	1.53177	up	3.85062e-10	4.77598e-08
51320	MEX3C	mex-3 RNA binding family member C	8.13972	8.1956	8.19964	7.2842	7.18852	7.24322	-1.91809	-0.939673	1.91809	down	2.02097e-11	6.56698e-09
57496	MKL2	MKL/myocardin-like 2	7.785	7.73918	7.79155	8.45826	8.3746	8.30822	1.52462	0.60845	1.52462	up	6.03026e-09	3.42627e-07
29883	CNOT7	CCR4-NOT transcription complex subunit 7	5.05219	5.23996	5.23601	5.80686	5.85069	5.73912	1.5399	0.622837	1.5399	up	1.49914e-06	2.24034e-05
283377	SPRYD4	SPRY domain containing 4	5.86485	5.88934	5.85006	6.55415	6.58894	6.61612	1.64527	0.71832	1.64527	up	1.24123e-08	5.85868e-07
1182	CLCN3	chloride channel, voltage-sensitive 3	9.20989	9.12241	9.14371	8.31366	8.30836	8.37651	-1.77255	-0.825827	1.77255	down	1.46121e-11	5.57785e-09
8349	HIST2H2BE	histone cluster 2, H2be	6.17075	6.10631	6.18104	7.16157	7.20489	7.14851	2.02645	1.01896	2.02645	up	6.74302e-11	1.51498e-08
100302736	TMED7-TICAM2	TMED7-TICAM2 readthrough	5.74211	5.92126	5.88216	5.15476	5.00059	5.35527	-1.60026	-0.678303	1.60026	down	4.51328e-06	5.38552e-05
90459	ERI1	exoribonuclease 1	8.14298	8.1261	8.20623	7.53208	7.47475	7.44919	-1.59449	-0.673097	1.59449	down	1.15381e-09	1.01716e-07
2936	GSR	glutathione reductase	8.21727	8.16078	8.11285	7.34707	7.53224	7.39931	-1.6672	-0.737427	1.6672	down	3.31315e-09	2.18935e-07
22858	ICK	intestinal cell (MAK-like) kinase	6.05959	6.29445	6.22958	7.13572	6.94768	6.76903	1.68912	0.75627	1.68912	up	8.70929e-07	1.45716e-05
1347	COX7A2	cytochrome c oxidase subunit VIIa polypeptide 2 (liver)	8.98154	9.09573	9.0757	7.99586	7.91175	8.03368	-2.10025	-1.07056	2.10025	down	3.34696e-12	2.02455e-09
284942	RPL23AP82	ribosomal protein L23a pseudogene 82	4.36077	3.88553	4.00837	4.74154	4.7264	4.62505	1.5292	0.612773	1.5292	up	8.7846e-05	0.000604997
2887	GRB10	growth factor receptor bound protein 10	6.24818	6.13544	6.01803	6.81758	7.07717	6.80837	1.70191	0.767157	1.70191	up	2.97944e-07	6.29477e-06
149076	ZNF362	zinc finger protein 362	7.65944	7.51768	7.6104	8.27071	8.37959	8.22847	1.62122	0.697083	1.62122	up	4.71644e-09	2.85733e-07
1831	TSC22D3	TSC22 domain family member 3	6.40245	6.29796	6.53406	6.95525	7.13916	6.98874	1.53286	0.616227	1.53286	up	7.90501e-07	1.35843e-05
55071	C9orf40	chromosome 9 open reading frame 40	6.40477	6.59676	6.55139	5.80237	5.82758	5.8801	-1.6032	-0.680957	1.6032	down	1.29258e-07	3.34134e-06
81848	SPRY4	sprouty RTK signaling antagonist 4	8.76329	8.70335	8.70503	9.33911	9.4194	9.44243	1.59817	0.676423	1.59817	up	1.43119e-10	2.42513e-08
25902	MTHFD1L	methylenetetrahydrofolate dehydrogenase (NADP+ dependent) 1-like	7.71326	7.73906	7.85386	7.05755	7.15049	6.99818	-1.62449	-0.699987	1.62449	down	1.03669e-08	5.17925e-07
9518	GDF15	growth differentiation factor 15	8.42456	8.46601	8.33204	7.43995	7.64729	7.4852	-1.8447	-0.88339	1.8447	down	7.40942e-10	7.42057e-08
26149	ZNF658	zinc finger protein 658	5.15015	5.75617	5.58883	6.09075	6.11541	6.09502	1.51783	0.60201	1.51783	up	0.000182305	0.00110769
56912	IFT46	intraflagellar transport 46	6.68618	6.66516	6.63875	5.76017	6.05796	5.94299	-1.67364	-0.74299	1.67364	down	1.52879e-07	3.8116e-06
54494	C11orf71	chromosome 11 open reading frame 71	5.70947	5.8397	5.65982	6.2559	6.40453	6.36018	1.51979	0.603873	1.51979	up	9.25596e-07	1.52755e-05
2177	FANCD2	Fanconi anemia complementation group D2	6.18747	6.31409	6.20504	5.56769	5.64344	5.51849	-1.57898	-0.658993	1.57898	down	2.07949e-07	4.78416e-06
2635	GBP3	guanylate binding protein 3	6.20556	6.21539	6.23355	7.09032	7.16204	7.06255	1.84907	0.886803	1.84907	up	4.21906e-10	5.07293e-08
4763	NF1	neurofibromin 1	5.26233	5.37892	5.03086	4.37049	4.68726	4.46952	-1.64142	-0.714947	1.64142	down	1.07849e-05	0.000108896
152559	PAQR3	progestin and adipoQ receptor family member III	7.54493	7.5441	7.47127	6.72131	6.77951	6.69912	-1.72523	-0.786787	1.72523	down	7.29514e-10	7.35463e-08
55105	GPATCH2	G-patch domain containing 2	5.84878	6.06283	6.06283	5.26675	5.42672	5.33111	-1.56912	-0.649953	1.56912	down	1.44051e-06	2.17004e-05
200316	APOBEC3F	apolipoprotein B mRNA editing enzyme, catalytic polypeptide-like 3F	7.28484	7.08398	7.32348	6.47551	6.56232	6.66289	-1.58432	-0.66386	1.58432	down	3.28385e-07	6.78979e-06
4087	SMAD2	SMAD family member 2	6.39834	6.56472	6.38302	5.80353	5.89981	5.78616	-1.53566	-0.61886	1.53566	down	5.58773e-07	1.03339e-05
89970	RSPRY1	ring finger and SPRY domain containing 1	8.25513	8.27845	8.28997	7.34546	7.46231	7.51426	-1.78242	-0.83384	1.78242	down	2.43584e-10	3.46341e-08
91408	BTF3L4	basic transcription factor 3-like 4	7.46733	7.49056	7.53621	8.26535	8.23622	8.21825	1.67238	0.741907	1.67238	up	1.6842e-10	2.62775e-08
57654	UVSSA	UV stimulated scaffold protein A	7.23386	7.25781	7.28102	6.72796	6.71465	6.57133	-1.50134	-0.58625	1.50134	down	1.01335e-07	2.78039e-06
56063	TMEM234	transmembrane protein 234	6.14025	6.57708	6.46855	7.54198	7.61333	7.3373	2.14688	1.10224	2.14688	up	4.10231e-08	1.40992e-06
7915	ALDH5A1	aldehyde dehydrogenase 5 family member A1	6.19489	6.26251	6.06152	5.29439	5.45413	5.15137	-1.83148	-0.87301	1.83148	down	1.21065e-07	3.18825e-06
868	CBLB	Cbl proto-oncogene B, E3 ubiquitin protein ligase	8.82725	8.73134	8.72482	8.09151	8.07916	8.01043	-1.62537	-0.70077	1.62537	down	3.98091e-10	4.87605e-08
201595	STT3B	STT3B, subunit of the oligosaccharyltransferase complex (catalytic)	9.77663	9.74932	9.72715	8.73627	8.86596	8.75324	-1.95325	-0.965877	1.95325	down	2.07256e-12	1.42963e-09
57380	MRS2	MRS2, magnesium transporter	8.20992	8.29694	8.39571	8.99563	8.90539	8.83238	1.52655	0.610277	1.52655	up	2.76063e-08	1.05484e-06
92	ACVR2A	activin A receptor type IIA	6.08403	6.18001	6.30021	6.8532	6.82639	6.76531	1.54423	0.626883	1.54423	up	2.60481e-07	5.66146e-06
692063	SNORA32	small nucleolar RNA, H/ACA box 32	6.90332	7.04184	6.84601	6.11912	6.22415	6.21699	-1.67439	-0.743637	1.67439	down	3.03447e-08	1.12589e-06
4520	MTF1	metal-regulatory transcription factor 1	6.87781	6.83331	6.6559	7.29555	7.49635	7.42409	1.53296	0.616323	1.53296	up	5.27586e-07	9.89677e-06
84129	ACAD11	acyl-CoA dehydrogenase family member 11	7.14176	7.25406	7.15106	6.58287	6.62278	6.56486	-1.50746	-0.592123	1.50746	down	5.47264e-08	1.74626e-06
2521	FUS	FUS RNA binding protein	10.177	10.1067	10.1405	10.7667	10.7022	10.7133	1.50109	0.586013	1.50109	up	4.75802e-11	1.17658e-08
19	ABCA1	ATP binding cassette subfamily A member 1	4.20793	4.05353	4.44183	3.38369	3.30612	3.60348	-1.74513	-0.803333	1.74513	down	6.41832e-06	7.15293e-05
80854	SETD7	SET domain containing (lysine methyltransferase) 7	9.14721	9.11515	9.17112	8.367	8.31917	8.35123	-1.73952	-0.798693	1.73952	down	8.45171e-12	3.75711e-09
34	ACADM	acyl-CoA dehydrogenase, C-4 to C-12 straight chain	5.91177	6.058	6.16765	6.6913	6.56127	6.7379	1.53441	0.617683	1.53441	up	1.41039e-06	2.13657e-05
10605	PAIP1	poly(A) binding protein interacting protein 1	5.99593	6.22105	6.22314	7.11921	6.86318	6.89729	1.75709	0.813187	1.75709	up	1.42959e-07	3.60652e-06
80856	KIAA1715	KIAA1715	7.34671	7.47436	7.34926	6.73564	6.79902	6.75348	-1.54477	-0.627397	1.54477	down	2.57202e-08	9.99973e-07
116150	NUS1	NUS1 dehydrodolichyl diphosphate synthase subunit	9.34697	9.48911	9.47626	8.72567	8.75814	8.66005	-1.65041	-0.722827	1.65041	down	3.44211e-10	4.44463e-08
5007	OSBP	oxysterol binding protein	9.28911	9.28613	9.26165	8.55844	8.65886	8.61923	-1.58753	-0.666787	1.58753	down	1.14522e-10	2.04201e-08
408186	OVOS	ovostatin	7.57621	7.53272	7.54323	6.66151	6.52885	6.53924	-1.96453	-0.974187	1.96453	down	1.00175e-10	1.90275e-08
51714	SELT	selenoprotein T	9.91278	9.89334	9.84044	8.89681	9.07703	8.97768	-1.86393	-0.898347	1.86393	down	1.958e-11	6.46931e-09
92912	UBE2Q2	ubiquitin conjugating enzyme E2Q family member 2	6.74225	6.7786	6.85132	5.92639	5.89816	5.93409	-1.82915	-0.871177	1.82915	down	1.23758e-09	1.06475e-07
6662	SOX9	SRY-box 9	3.89258	3.54508	3.46448	4.2946	4.38666	4.23234	1.59161	0.670487	1.59161	up	3.27574e-05	0.000267266
54700	RRN3	RRN3 homolog, RNA polymerase I transcription factor	8.11142	8.13101	8.07659	7.35999	7.39933	7.3473	-1.66725	-0.737467	1.66725	down	2.21405e-10	3.27263e-08
9143	SYNGR3	synaptogyrin 3	7.73469	7.66291	7.7023	6.91067	7.08644	6.99448	-1.62763	-0.70277	1.62763	down	6.68749e-09	3.73057e-07
2495	FTH1	ferritin, heavy polypeptide 1	7.84521	7.90614	7.71224	6.89139	6.97754	6.99338	-1.82398	-0.867093	1.82398	down	9.99134e-10	9.1358e-08
56123	PCDHB13	protocadherin beta 13	5.70574	5.91344	6.20304	6.70513	6.33101	6.60562	1.52258	0.606513	1.52258	up	0.000147564	0.000930837
25980	AAR2	AAR2 splicing factor homolog	8.12949	8.16648	8.08512	7.57278	7.49009	7.51394	-1.51722	-0.601427	1.51722	down	4.47436e-09	2.74023e-07
6672	SP100	SP100 nuclear antigen	3.98583	3.61306	4.18368	5.2008	4.66885	4.58999	1.85621	0.892357	1.85621	up	7.95261e-05	0.000557065
55184	DZANK1	double zinc ribbon and ankyrin repeat domains 1	4.73055	4.44108	4.50262	5.21854	5.13129	5.33883	1.59269	0.67147	1.59269	up	5.56254e-06	6.37818e-05
11124	FAF1	Fas (TNFRSF6) associated factor 1	8.30854	8.33449	8.30871	7.64735	7.69813	7.72657	-1.54388	-0.626563	1.54388	down	1.06755e-09	9.58307e-08
51185	CRBN	cereblon	6.96681	7.05619	7.03527	7.67974	7.53382	7.68309	1.52922	0.612793	1.52922	up	4.03173e-08	1.38687e-06
144203	OVOS2	ovostatin 2	7.57621	7.53272	7.54323	6.66151	6.52885	6.53924	-1.96453	-0.974187	1.96453	down	1.00175e-10	1.90275e-08
79038	ZFYVE21	zinc finger, FYVE domain containing 21	7.38806	7.46025	7.47756	8.16387	8.08643	8.15597	1.61716	0.693467	1.61716	up	9.85597e-10	9.03303e-08
4683	NBN	nibrin	8.99997	8.96017	8.98029	8.35611	8.3955	8.32175	-1.53939	-0.622357	1.53939	down	2.84798e-10	3.88169e-08
10672	GNA13	guanine nucleotide binding protein (G protein), alpha 13	9.15023	9.11366	9.23089	8.34499	8.27366	8.28324	-1.82045	-0.864297	1.82045	down	1.57196e-11	5.73858e-09
151313	FAHD2B	fumarylacetoacetate hydrolase domain containing 2B	7.4179	7.41341	7.31268	6.7426	6.92971	6.64254	-1.52596	-0.609713	1.52596	down	6.63043e-07	1.18622e-05
53918	PELO	pelota homolog (Drosophila)	8.57041	8.55262	8.53206	7.82552	7.9019	7.86594	-1.6102	-0.687243	1.6102	down	2.14666e-10	3.19706e-08
10284	SAP18	Sin3A associated protein 18kDa	7.36404	7.37228	7.25025	6.52914	6.7505	6.54381	-1.64837	-0.72104	1.64837	down	5.73875e-08	1.8022e-06
8693	GALNT4	polypeptide N-acetylgalactosaminyltransferase 4	6.5822	6.74434	6.66263	7.33352	7.41134	7.40239	1.64645	0.71936	1.64645	up	8.08928e-09	4.30968e-07
1382	CRABP2	cellular retinoic acid binding protein 2	7.58344	7.61911	7.45811	6.8631	7.03016	6.93014	-1.52882	-0.61242	1.52882	down	1.1141e-07	2.97784e-06
51527	GSKIP	GSK3B interacting protein	8.02212	7.9925	8.06835	8.74917	8.65256	8.68516	1.58884	0.667973	1.58884	up	4.96457e-10	5.65788e-08
7071	KLF10	Kruppel-like factor 10	9.37053	9.35427	9.4773	10.6401	10.4791	10.5705	2.23852	1.16255	2.23852	up	6.94642e-13	6.50284e-10
55529	TMEM55A	transmembrane protein 55A	8.09222	8.3179	8.50964	9.0316	8.90838	8.9354	1.57121	0.651873	1.57121	up	1.20988e-06	1.88889e-05
440	ASNS	asparagine synthetase (glutamine-hydrolyzing)	10.5532	10.6207	10.6058	9.39494	9.44351	9.35832	-2.28832	-1.19429	2.28832	down	1.33895e-14	3.09676e-11
7799	PRDM2	PR domain containing 2, with ZNF domain	6.45087	6.50671	6.46256	6.98762	7.07687	7.13071	1.50701	0.591687	1.50701	up	9.17624e-08	2.57262e-06
56624	ASAH2	N-acylsphingosine amidohydrolase (non-lysosomal ceramidase) 2	5.33828	4.94273	5.13857	5.7108	5.856	5.68015	1.52533	0.609123	1.52533	up	2.31414e-05	0.000200855
101929946	ZEB1-AS1	ZEB1 antisense RNA 1	6.25577	6.19011	6.25769	7.19348	7.22759	7.19916	1.96186	0.97222	1.96186	up	9.05714e-11	1.78549e-08
54793	KCTD9	potassium channel tetramerization domain containing 9	6.08971	6.08757	6.06899	5.27819	5.48636	5.35323	-1.63523	-0.709497	1.63523	down	1.6301e-07	3.98163e-06
54492	NEURL1B	neuralized E3 ubiquitin protein ligase 1B	6.33083	6.34985	6.34664	5.7196	5.80968	5.52912	-1.57604	-0.656307	1.57604	down	7.2848e-07	1.27512e-05
376940	ZC3H6	zinc finger CCCH-type containing 6	5.66203	5.82857	5.90159	6.41284	6.40748	6.42511	1.53448	0.617747	1.53448	up	6.97908e-07	1.23161e-05
805	CALM2	calmodulin 2 (phosphorylase kinase, delta)	8.36013	8.43058	8.37868	7.70832	7.73454	7.74017	-1.58241	-0.66212	1.58241	down	4.37708e-10	5.21509e-08
9183	ZW10	zw10 kinetochore protein	7.43198	7.38828	7.35508	6.80017	6.65305	6.60238	-1.63193	-0.70658	1.63193	down	1.92566e-08	8.08035e-07
5999	RGS4	regulator of G-protein signaling 4	10.5578	10.4981	10.6327	9.76481	9.77604	9.70865	-1.75688	-0.813017	1.75688	down	7.32757e-12	3.42982e-09
9270	ITGB1BP1	integrin beta 1 binding protein 1	4.73	4.80367	4.6648	5.90155	5.55828	5.77322	2.01604	1.01153	2.01604	up	3.99025e-08	1.37381e-06
29101	SSU72	SSU72 homolog, RNA polymerase II CTD phosphatase	3.68832	3.41086	3.56914	4.30329	4.33412	4.05284	1.59546	0.673977	1.59546	up	1.64769e-05	0.000152325
64841	GNPNAT1	glucosamine-phosphate N-acetyltransferase 1	9.14221	9.15431	9.13979	8.48909	8.50054	8.58744	-1.53661	-0.619747	1.53661	down	3.78657e-10	4.75656e-08
788	SLC25A20	solute carrier family 25 (carnitine/acylcarnitine translocase), member 20	6.73276	6.9572	6.94023	7.4401	7.49914	7.50927	1.52215	0.606107	1.52215	up	2.17143e-07	4.93219e-06
10130	PDIA6	protein disulfide isomerase family A member 6	10.7591	10.7629	10.7495	9.39687	9.50397	9.36975	-2.52038	-1.33364	2.52038	down	8.59956e-15	2.25412e-11
3017	HIST1H2BD	histone cluster 1, H2bd	6.76151	6.74966	6.76324	7.95161	7.90792	7.90115	2.23781	1.16209	2.23781	up	1.39027e-12	1.09325e-09
4144	MAT2A	methionine adenosyltransferase II, alpha	6.46769	6.84556	6.66811	7.2855	7.40536	7.25989	1.57621	0.656463	1.57621	up	1.76021e-06	2.54534e-05
10144	FAM13A	family with sequence similarity 13 member A	6.18068	6.26376	6.48347	6.94221	7.05209	6.87409	1.56572	0.646827	1.56572	up	1.28106e-06	1.97608e-05
6675	UAP1	UDP-N-acetylglucosamine pyrophosphorylase 1	10.7527	10.7543	10.7716	9.59337	9.57057	9.57938	-2.26334	-1.17845	2.26334	down	1.5284e-15	8.58482e-12
54737	MPHOSPH8	M-phase phosphoprotein 8	7.69527	7.69024	7.67482	8.35527	8.53352	8.39591	1.67186	0.741457	1.67186	up	1.0238e-09	9.29095e-08
81790	RNF170	ring finger protein 170	5.49242	5.54589	5.54448	6.38136	6.20078	6.08723	1.61948	0.695527	1.61948	up	5.69839e-07	1.05187e-05
353376	TICAM2	toll-like receptor adaptor molecule 2	5.74211	5.92126	5.88216	5.15476	5.00059	5.35527	-1.60026	-0.678303	1.60026	down	4.51328e-06	5.38552e-05
6885	MAP3K7	mitogen-activated protein kinase kinase kinase 7	6.1278	6.01534	5.93617	5.03866	4.9924	5.29379	-1.88969	-0.918153	1.88969	down	9.57777e-08	2.66322e-06
5795	PTPRJ	protein tyrosine phosphatase, receptor type, J	7.66922	7.67089	7.65901	6.89849	6.87658	6.92492	-1.70099	-0.766377	1.70099	down	3.16029e-10	4.18371e-08
2744	GLS	glutaminase	4.9465	4.95185	4.9369	5.69595	5.51194	5.65317	1.5969	0.67527	1.5969	up	4.59232e-07	8.8597e-06
9134	CCNE2	cyclin E2	7.47051	7.53739	7.74949	8.25006	8.12433	8.16609	1.50981	0.594363	1.50981	up	4.17526e-07	8.22871e-06
100529207	RAD51L3-RFFL	RAD51L3-RFFL readthrough	8.68881	8.83911	8.88719	8.17277	8.00331	7.95697	-1.6943	-0.760687	1.6943	down	1.07845e-08	5.30695e-07
85458	DIXDC1	DIX domain containing 1	6.14252	6.39857	6.32792	6.8923	6.95268	7.01677	1.58474	0.664247	1.58474	up	2.92904e-07	6.2083e-06
25923	ATL3	atlastin GTPase 3	8.38561	8.24954	8.2956	9.32682	9.34801	9.31516	2.02756	1.01975	2.02756	up	1.60439e-12	1.1894e-09
3685	ITGAV	integrin alpha V	5.75015	5.96166	6.23018	6.95861	6.33101	6.68398	1.59904	0.677203	1.59904	up	0.000269209	0.00153581
114882	OSBPL8	oxysterol binding protein like 8	6.04152	6.22386	6.06289	5.5596	5.44682	5.51884	-1.51677	-0.601003	1.51677	down	1.20886e-06	1.88835e-05
285362	SUMF1	sulfatase modifying factor 1	7.6409	7.65399	7.65008	8.48384	8.39138	8.48343	1.74661	0.80456	1.74661	up	5.97726e-11	1.39061e-08
64398	MPP5	membrane protein, palmitoylated 5	7.60366	7.59866	7.61258	6.87388	6.9549	6.95232	-1.59985	-0.677933	1.59985	down	2.38555e-09	1.74197e-07
57563	KLHL8	kelch like family member 8	6.28562	6.3307	6.07465	5.62032	5.50999	5.57252	-1.58306	-0.662713	1.58306	down	8.54257e-07	1.43671e-05
29880	ALG5	ALG5, dolichyl-phosphate beta-glucosyltransferase	8.53938	8.43429	8.49524	9.25831	9.32109	9.27084	1.73361	0.793777	1.73361	up	2.23915e-11	7.05266e-09
10813	UTP14A	UTP14A small subunit processome component	7.19124	7.11098	7.09419	6.5188	6.57911	6.54319	-1.50015	-0.585103	1.50015	down	5.50252e-08	1.74756e-06
84444	DOT1L	DOT1-like histone H3K79 methyltransferase	7.14954	7.1438	7.01781	7.66018	7.84592	7.70449	1.55094	0.633147	1.55094	up	6.62359e-08	2.02232e-06
10793	ZNF273	zinc finger protein 273	4.32447	3.95246	4.31196	3.36395	3.33295	3.55613	-1.71549	-0.77862	1.71549	down	8.02733e-06	8.56263e-05
54809	SAMD9	sterile alpha motif domain containing 9	6.37931	6.32502	6.45649	7.20802	7.08485	7.04411	1.65334	0.725387	1.65334	up	2.17554e-08	8.83654e-07
101929839	LOC101929839	uncharacterized LOC101929839	7.62913	7.59098	7.5936	8.15227	8.20138	8.22398	1.50313	0.587973	1.50313	up	2.92968e-09	2.0138e-07
138199	CARNMT1	carnosine N-methyltransferase 1	5.79575	5.85635	5.4813	6.49727	6.31625	6.48713	1.64994	0.722417	1.64994	up	2.69554e-06	3.58657e-05
57474	ZNF490	zinc finger protein 490	5.54167	5.38265	5.44325	6.52909	6.3779	6.23217	1.89719	0.923863	1.89719	up	3.21988e-08	1.17112e-06
23176	SEPT8	septin 8	7.95407	7.89145	7.95305	8.58428	8.58062	8.60113	1.57551	0.65582	1.57551	up	2.92184e-10	3.9478e-08
30844	EHD4	EH domain containing 4	6.35132	6.30173	6.24339	5.59012	5.73519	5.6791	-1.54829	-0.630677	1.54829	down	2.86509e-07	6.09577e-06
432	ASGR1	asialoglycoprotein receptor 1	7.38783	7.43745	7.19484	6.51362	6.5844	6.48488	-1.75614	-0.812407	1.75614	down	1.25141e-08	5.87604e-07
2673	GFPT1	glutamine--fructose-6-phosphate transaminase 1	8.64101	8.69382	8.75264	7.74006	7.71429	7.69717	-1.97062	-0.97865	1.97062	down	4.55783e-12	2.42169e-09
122622	ADSSL1	adenylosuccinate synthase like 1	5.66301	5.65836	5.42638	4.98557	4.96161	5.04367	-1.5007	-0.585633	1.5007	down	6.08285e-06	6.85092e-05
642477	LINC01296	long intergenic non-protein coding RNA 1296	7.62913	7.59098	7.5936	8.15227	8.20138	8.22398	1.50313	0.587973	1.50313	up	2.92968e-09	2.0138e-07
728441	GGT2	gamma-glutamyltransferase 2	5.92034	5.76946	5.74232	5.01344	5.29668	5.31585	-1.51787	-0.60205	1.51787	down	1.34655e-05	0.00012932
80273	GRPEL1	GrpE-like 1, mitochondrial (E. coli)	9.06261	9.01536	8.99847	8.33999	8.47464	8.42553	-1.52848	-0.612093	1.52848	down	1.62223e-09	1.30828e-07
11030	RBPMS	RNA binding protein with multiple splicing	4.93772	4.85157	5.10664	5.87969	6.1241	5.92296	2.01429	1.01027	2.01429	up	2.94375e-08	1.11058e-06
79101	TAF1D	TATA-box binding protein associated factor, RNA polymerase I, D	6.90332	7.04184	6.84601	6.11912	6.22415	6.21699	-1.67439	-0.743637	1.67439	down	3.03447e-08	1.12589e-06
57017	COQ9	coenzyme Q9	8.58289	8.48194	8.50834	7.84366	7.99967	7.89346	-1.52851	-0.612127	1.52851	down	9.31068e-09	4.77052e-07
84056	KATNAL1	katanin p60 subunit A-like 1	6.82506	6.78704	6.57503	7.40465	7.28267	7.36082	1.53723	0.620337	1.53723	up	3.99997e-07	7.92695e-06
5339	PLEC	plectin	8.69219	8.67228	8.6053	9.26277	9.37106	9.31478	1.57966	0.659613	1.57966	up	3.21956e-10	4.21956e-08
254428	SLC41A1	solute carrier family 41 (magnesium transporter), member 1	8.20819	8.16242	8.19982	7.35641	7.42771	7.42147	-1.72701	-0.78828	1.72701	down	1.04061e-10	1.9119e-08
22875	ENPP4	ectonucleotide pyrophosphatase/phosphodiesterase 4 (putative)	6.40333	6.86353	6.79232	6.14638	6.02942	6.04185	-1.53033	-0.613843	1.53033	down	2.79549e-05	0.000234057
10330	CNPY2	canopy FGF signaling regulator 2	7.42147	7.54246	7.55543	8.07653	8.1518	8.06041	1.50503	0.589793	1.50503	up	2.00238e-08	8.32237e-07
4189	DNAJB9	DnaJ heat shock protein family (Hsp40) member B9	7.42619	7.58375	7.53024	8.26856	8.1879	8.1933	1.6281	0.703193	1.6281	up	2.42424e-09	1.75536e-07
5550	PREP	prolyl endopeptidase	7.54535	7.57621	7.52756	6.82237	7.06156	6.87453	-1.5478	-0.63022	1.5478	down	1.16021e-07	3.076e-06
8440	NCK2	NCK adaptor protein 2	8.32734	8.34299	8.20956	7.35613	7.53027	7.46695	-1.79276	-0.84218	1.79276	down	7.41718e-10	7.42057e-08
9863	MAGI2	membrane associated guanylate kinase, WW and PDZ domain containing 2	4.38693	4.14268	4.15678	5.07115	5.21885	5.01915	1.83306	0.874253	1.83306	up	2.52739e-07	5.5484e-06
11275	KLHL2	kelch like family member 2	6.40225	6.72293	6.63402	5.15119	5.46871	5.1949	-2.48768	-1.3148	2.48768	down	3.9778e-09	2.51695e-07
23507	LRRC8B	leucine-rich repeat containing 8 family member B	5.19776	5.07717	5.29792	4.57261	4.47564	4.3663	-1.64654	-0.719433	1.64654	down	1.24971e-06	1.93809e-05
105370109	LOC105370109	uncharacterized LOC105370109	9.34697	9.48911	9.47626	8.72567	8.75814	8.66005	-1.65041	-0.722827	1.65041	down	3.44211e-10	4.44463e-08
117177	RAB3IP	RAB3A interacting protein	9.72612	9.73737	9.71794	9.09497	9.1791	9.13831	-1.50492	-0.589683	1.50492	down	1.45565e-10	2.42513e-08
23348	DOCK9	dedicator of cytokinesis 9	6.49993	6.60987	6.53536	6.13485	5.83723	5.90687	-1.50393	-0.588737	1.50393	down	3.46621e-06	4.3639e-05
3321	IGSF3	immunoglobulin superfamily member 3	6.95414	6.93784	6.78241	7.65451	7.74768	7.65171	1.73288	0.79317	1.73288	up	3.0143e-09	2.05757e-07
56950	SMYD2	SET and MYND domain containing 2	8.92203	9.11426	9.10483	8.5131	8.43415	8.3756	-1.52213	-0.60609	1.52213	down	3.40841e-08	1.2194e-06
201299	RDM1	RAD52 motif containing 1	4.47016	4.71866	4.76145	3.80313	4.07678	3.75573	-1.70709	-0.771543	1.70709	down	5.79953e-06	6.59034e-05
9522	SCAMP1	secretory carrier membrane protein 1	7.00601	6.97006	7.08558	6.46077	6.29945	6.46053	-1.53011	-0.613633	1.53011	down	1.85019e-07	4.38755e-06
57827	C6orf47	chromosome 6 open reading frame 47	5.75378	5.58948	5.47108	6.36826	6.46378	6.44301	1.7657	0.820237	1.7657	up	6.66388e-08	2.0286e-06
55754	TMEM30A	transmembrane protein 30A	8.84132	8.74132	8.88341	7.82552	7.98072	7.86022	-1.9095	-0.933197	1.9095	down	8.28597e-11	1.70569e-08
23243	ANKRD28	ankyrin repeat domain 28	6.83104	6.85143	6.80101	6.10193	6.14009	6.0854	-1.64568	-0.718687	1.64568	down	6.95865e-09	3.8481e-07
677805	SNORA18	small nucleolar RNA, H/ACA box 18	7.36441	7.37073	7.45477	6.80097	6.75568	6.78506	-1.53269	-0.616067	1.53269	down	1.48126e-08	6.59572e-07
6426	SRSF1	serine/arginine-rich splicing factor 1	7.90793	8.03536	7.95267	9.10034	8.9706	9.05484	2.10907	1.07661	2.10907	up	4.19254e-12	2.25812e-09
90416	C15orf57	chromosome 15 open reading frame 57	8.34474	8.30921	8.35548	8.9531	9.00828	9.02927	1.58053	0.660407	1.58053	up	1.60176e-10	2.5471e-08
8228	PNPLA4	patatin like phospholipase domain containing 4	4.98034	4.99058	5.05009	5.68012	5.66431	5.5925	1.55686	0.63864	1.55686	up	4.28557e-07	8.4208e-06
8898	MTMR2	myotubularin related protein 2	7.44883	7.50649	7.55574	8.46049	8.38632	8.39914	1.88117	0.91163	1.88117	up	2.45297e-11	7.35923e-09
3312	HSPA8	heat shock protein family A (Hsp70) member 8	5.75947	5.66023	5.62951	4.16845	4.38301	4.54373	-2.49321	-1.31801	2.49321	down	2.77391e-09	1.95807e-07
6095	RORA	RAR-related orphan receptor A	8.42793	8.47539	8.30639	7.79688	7.84999	7.78525	-1.50789	-0.59253	1.50789	down	1.5019e-08	6.65744e-07
9781	RNF144A	ring finger protein 144A	7.20758	7.3329	7.27779	6.51315	6.64081	6.54625	-1.6313	-0.70602	1.6313	down	1.23092e-08	5.83804e-07
8407	TAGLN2	transgelin 2	8.80393	8.82408	8.75734	9.54816	9.62237	9.56257	1.72021	0.782583	1.72021	up	9.43405e-12	3.98847e-09
115207	KCTD12	potassium channel tetramerization domain containing 12	6.91095	6.93673	6.90773	6.26552	6.3794	6.20873	-1.55178	-0.63392	1.55178	down	7.69952e-08	2.24947e-06
651302	ZNF192P1	zinc finger protein 192 pseudogene 1	3.83854	4.01928	3.82366	4.40662	4.52894	4.50247	1.50058	0.585517	1.50058	up	1.1945e-05	0.000117737
81562	LMAN2L	lectin, mannose-binding 2-like	5.81178	5.81447	5.92991	6.4584	6.47272	6.47385	1.53291	0.61627	1.53291	up	1.57411e-07	3.89742e-06
9786	KIAA0586	KIAA0586	3.48297	3.63596	3.39965	4.05718	4.20643	4.37874	1.63345	0.707923	1.63345	up	8.65072e-06	9.10897e-05
91947	ARRDC4	arrestin domain containing 4	5.74876	5.77256	5.80362	6.59584	6.63391	6.62388	1.79365	0.842897	1.79365	up	1.7846e-09	1.39497e-07
54332	GDAP1	ganglioside induced differentiation associated protein 1	5.30513	5.4872	5.1207	6.85563	7.09516	6.91574	3.14088	1.65117	3.14088	up	1.062e-10	1.94213e-08
316	AOX1	aldehyde oxidase 1	8.90789	8.98917	8.90889	8.29464	8.36085	8.33296	-1.52186	-0.605833	1.52186	down	8.28562e-10	8.08373e-08
375056	MIA3	melanoma inhibitory activity family member 3	6.67767	6.80878	6.85609	7.36869	7.47305	7.37604	1.5423	0.62508	1.5423	up	7.52967e-08	2.21099e-06
79365	BHLHE41	basic helix-loop-helix family member e41	7.46131	7.48712	7.4002	6.905	6.69124	6.87341	-1.54363	-0.626327	1.54363	down	1.20486e-07	3.17724e-06
5274	SERPINI1	serpin peptidase inhibitor, clade I (neuroserpin), member 1	5.77398	5.78586	5.72472	6.62776	6.76065	6.68756	1.9059	0.93047	1.9059	up	1.03633e-09	9.36696e-08
81543	LRRC3	leucine rich repeat containing 3	4.33941	3.87474	3.52361	4.71318	5.03593	4.76952	1.90126	0.926957	1.90126	up	5.81873e-05	0.000428188
3687	ITGAX	integrin alpha X	7.75203	7.53293	7.5287	6.30992	6.41893	6.57866	-2.24812	-1.16872	2.24812	down	8.56538e-10	8.27454e-08
55973	BCAP29	B-cell receptor-associated protein 29	5.71292	5.51594	5.67474	6.2541	6.4188	6.29111	1.60971	0.686803	1.60971	up	3.59974e-07	7.31444e-06
3399	ID3	inhibitor of DNA binding 3, dominant negative helix-loop-helix protein	8.72021	8.61399	8.70037	9.48919	9.40902	9.45864	1.71011	0.774093	1.71011	up	3.47534e-11	9.55548e-09
10428	CFDP1	craniofacial development protein 1	7.95246	7.85732	7.80071	7.04088	7.14509	7.02005	-1.7429	-0.80149	1.7429	down	1.4166e-09	1.17808e-07
79600	TCTN1	tectonic family member 1	5.87519	6.15131	6.0255	5.25325	5.31603	5.3983	-1.61867	-0.694807	1.61867	down	8.57896e-07	1.43981e-05
414328	IDNK	idnK, gluconokinase homolog (E. coli)	6.2976	6.13315	6.18161	5.34158	5.2678	5.17159	-1.92358	-0.943797	1.92358	down	7.53168e-09	4.07766e-07
201627	DENND6A	DENN/MADD domain containing 6A	8.08113	8.09827	8.07298	8.95347	8.85621	8.84058	1.74025	0.799293	1.74025	up	4.12925e-11	1.06114e-08
91227	GGTLC2	gamma-glutamyltransferase light chain 2	5.92034	5.76946	5.74232	5.01344	5.29668	5.31585	-1.51787	-0.60205	1.51787	down	1.34655e-05	0.00012932
3954	LETM1	leucine zipper-EF-hand containing transmembrane protein 1	6.59949	6.49727	6.31215	7.18269	7.36233	7.08228	1.66955	0.739463	1.66955	up	5.04143e-07	9.56656e-06
22936	ELL2	elongation factor, RNA polymerase II, 2	8.58498	8.69176	8.76981	7.92361	7.59763	7.8528	-1.85425	-0.890837	1.85425	down	1.32502e-08	6.11467e-07
6515	SLC2A3	solute carrier family 2 (facilitated glucose transporter), member 3	6.97683	6.92062	6.84137	5.6459	5.97278	5.57971	-2.26599	-1.18014	2.26599	down	5.81259e-09	3.33633e-07
6158	RPL28	ribosomal protein L28	8.39924	8.47649	8.45466	9.00447	9.10517	9.07624	1.53527	0.618497	1.53527	up	7.76953e-10	7.7142e-08
219539	YPEL4	yippee like 4	5.19673	5.2303	5.26704	4.44595	4.73291	4.64062	-1.54206	-0.624863	1.54206	down	5.36998e-06	6.18807e-05
6715	SRD5A1	steroid-5-alpha-reductase, alpha polypeptide 1 (3-oxo-5 alpha-steroid delta 4-dehydrogenase alpha 1)	4.30963	4.5301	4.89093	5.65707	5.47006	5.50827	1.95646	0.968247	1.95646	up	1.92058e-06	2.73104e-05
4756	NEO1	neogenin 1	8.33167	8.28697	8.27795	7.13288	7.26328	7.2962	-2.09664	-1.06808	2.09664	down	1.37965e-11	5.31815e-09
9908	G3BP2	GTPase activating protein (SH3 domain) binding protein 2	7.27617	7.27291	7.16997	6.5393	6.76591	6.58303	-1.52654	-0.61027	1.52654	down	3.31513e-07	6.83862e-06
132320	SCLT1	sodium channel and clathrin linker 1	5.50454	5.67608	5.73683	6.48695	6.27937	6.3224	1.65148	0.723757	1.65148	up	4.3034e-07	8.44479e-06
158135	TTLL11	tubulin tyrosine ligase like11	3.56207	3.9248	3.95072	4.61331	4.90411	4.61916	1.86563	0.899663	1.86563	up	2.685e-06	3.57375e-05
653082	ZDHHC11B	zinc finger, DHHC-type containing 11B	5.60756	5.72297	5.81605	5.04258	5.25925	4.97591	-1.54002	-0.622947	1.54002	down	7.38336e-06	7.99501e-05
60312	AFAP1	actin filament associated protein 1	5.78343	5.7381	5.71896	6.32004	6.5444	6.30532	1.56167	0.64309	1.56167	up	7.2148e-07	1.26639e-05
201158	TVP23C	trans-golgi network vesicle protein 23 homolog C (S. cerevisiae)	9.3253	9.43329	9.42593	8.4017	8.32008	8.34733	-2.05405	-1.03847	2.05405	down	1.30956e-12	1.0508e-09
84328	LZIC	leucine zipper and CTNNBIP1 domain containing	7.84521	7.70519	7.69576	7.04252	7.18631	7.01976	-1.58651	-0.665857	1.58651	down	3.77755e-08	1.32555e-06
150864	FAM117B	family with sequence similarity 117 member B	7.11559	7.18581	7.10334	6.56232	6.40099	6.55238	-1.54723	-0.629683	1.54723	down	8.18623e-08	2.35799e-06
100093631	GTF2IP4	general transcription factor IIi, pseudogene 4	7.39	7.25527	7.31592	7.95909	7.8745	7.91603	1.51167	0.596143	1.51167	up	1.65834e-08	7.22066e-07
5796	PTPRK	protein tyrosine phosphatase, receptor type, K	7.19592	7.19537	7.26186	6.54663	6.71002	6.53487	-1.53745	-0.620543	1.53745	down	9.68658e-08	2.68967e-06
100533955	SENP3-EIF4A1	SENP3-EIF4A1 readthrough (NMD candidate)	11.8105	11.908	11.916	11.2538	11.2417	11.2594	-1.54383	-0.62651	1.54383	down	1.18539e-11	4.75585e-09
57657	HCN3	hyperpolarization activated cyclic nucleotide gated potassium channel 3	4.81986	4.85212	4.62488	5.49362	5.42592	5.62951	1.68264	0.75073	1.68264	up	7.24834e-07	1.27058e-05
10019	SH2B3	SH2B adaptor protein 3	8.10332	7.97913	8.09354	8.84058	8.89397	8.86813	1.75187	0.808897	1.75187	up	6.52235e-11	1.50403e-08
6505	SLC1A1	solute carrier family 1 (neuronal/epithelial high affinity glutamate transporter, system Xag), member 1	7.20611	7.17602	7.18508	6.29087	6.38027	6.33172	-1.80849	-0.854783	1.80849	down	4.5965e-10	5.36277e-08
284390	ZNF763	zinc finger protein 763	3.90906	3.77348	3.8687	4.55682	4.55569	4.3918	1.57028	0.651023	1.57028	up	3.3114e-06	4.20535e-05
8507	ENC1	ectodermal-neural cortex 1 (with BTB domain)	8.86593	8.87214	8.89263	7.8603	7.93443	7.90397	-1.96882	-0.977333	1.96882	down	1.44282e-12	1.11233e-09
5664	PSEN2	presenilin 2	6.19838	6.25049	6.13485	6.88535	7.043	6.96153	1.70376	0.76872	1.70376	up	1.05111e-08	5.22353e-07
2679	GGT3P	gamma-glutamyltransferase 3 pseudogene	5.92034	5.76946	5.74232	5.01344	5.29668	5.31585	-1.51787	-0.60205	1.51787	down	1.34655e-05	0.00012932
5719	PSMD13	proteasome 26S subunit, non-ATPase 13	9.25829	9.21691	9.17459	8.50532	8.74475	8.568	-1.52687	-0.610573	1.52687	down	3.11907e-08	1.1472e-06
102724823	LOC102724823	inactive gamma-glutamyltranspeptidase 2	5.92034	5.76946	5.74232	5.01344	5.29668	5.31585	-1.51787	-0.60205	1.51787	down	1.34655e-05	0.00012932
54014	BRWD1	bromodomain and WD repeat domain containing 1	6.52966	6.41771	6.33594	5.54208	5.76472	5.6916	-1.69541	-0.761637	1.69541	down	1.48045e-07	3.71464e-06
79366	HMGN5	high mobility group nucleosome binding domain 5	6.8858	7.22759	7.21496	7.97747	7.4346	7.68972	1.50644	0.591147	1.50644	up	0.00018002	0.00109686
55171	TBCCD1	TBCC domain containing 1	5.60469	5.79493	5.90243	6.50567	6.26653	6.40381	1.54184	0.624653	1.54184	up	4.98898e-06	5.83279e-05
389125	MUSTN1	musculoskeletal, embryonic nuclear protein 1	4.85212	4.66925	4.68958	4.0661	4.21954	4.01629	-1.55438	-0.63634	1.55438	down	6.02642e-06	6.80491e-05
23270	TSPYL4	TSPY-like 4	8.07894	8.05872	8.09948	8.86492	8.78028	8.86077	1.68913	0.756277	1.68913	up	5.43207e-11	1.30231e-08
26227	PHGDH	phosphoglycerate dehydrogenase	9.84445	9.79496	9.74953	9.15357	9.22875	9.1695	-1.52877	-0.612373	1.52877	down	2.3309e-10	3.35701e-08
22982	DIP2C	disco interacting protein 2 homolog C	7.42867	7.32252	7.31598	7.90174	8.02336	7.90474	1.5027	0.587557	1.5027	up	3.38964e-08	1.21379e-06
56605	ERO1B	endoplasmic reticulum oxidoreductase beta	5.42326	5.58277	5.61357	6.24486	6.24892	6.45007	1.71089	0.77475	1.71089	up	1.72026e-07	4.15463e-06
11259	FILIP1L	filamin A interacting protein 1-like	5.99496	5.97423	5.93348	5.14779	5.56581	5.34652	-1.53069	-0.614183	1.53069	down	1.4779e-05	0.000139348
9724	UTP14C	UTP14, U3 small nucleolar ribonucleoprotein, homolog C (yeast)	7.19124	7.11098	7.09419	6.5188	6.57911	6.54319	-1.50015	-0.585103	1.50015	down	5.50252e-08	1.74756e-06
23262	PPIP5K2	diphosphoinositol pentakisphosphate kinase 2	7.55907	7.70536	7.60073	8.28296	8.19512	8.23099	1.53117	0.614637	1.53117	up	9.32586e-09	4.77052e-07
10026	PIGK	phosphatidylinositol glycan anchor biosynthesis class K	5.92986	5.85657	5.86021	5.05047	5.02889	5.11877	-1.76073	-0.81617	1.76073	down	1.89227e-08	7.96577e-07
2519	FUCA2	fucosidase, alpha-L- 2, plasma	10.1564	10.1743	10.1198	9.56023	9.5913	9.48697	-1.51991	-0.60399	1.51991	down	1.52677e-10	2.50124e-08
7368	UGT8	UDP glycosyltransferase 8	9.92135	9.94508	9.93012	9.19626	9.09521	9.16834	-1.71584	-0.778913	1.71584	down	6.04238e-12	3.00727e-09
9779	TBC1D5	TBC1 domain family member 5	8.12955	8.00233	8.03408	7.36661	7.4123	7.39078	-1.58603	-0.665423	1.58603	down	2.40131e-09	1.74197e-07
9310	ZNF235	zinc finger protein 235	5.44228	5.2591	5.38107	5.97406	6.04933	6.02942	1.57657	0.656787	1.57657	up	3.78181e-07	7.6019e-06
10204	NUTF2	nuclear transport factor 2	10.1642	10.1504	10.2127	9.42939	9.29175	9.32357	-1.77466	-0.827543	1.77466	down	1.09675e-11	4.53914e-09
113146	AHNAK2	AHNAK nucleoprotein 2	6.15438	6.20359	6.02099	4.98055	5.2382	4.9722	-2.08879	-1.06267	2.08879	down	1.17105e-08	5.64257e-07
57182	ANKRD50	ankyrin repeat domain 50	7.84669	7.86372	7.82944	7.08701	7.18291	7.10931	-1.64742	-0.720207	1.64742	down	8.0396e-10	7.94224e-08
79993	ELOVL7	ELOVL fatty acid elongase 7	7.78072	7.76114	7.7224	7.06132	7.0268	7.10334	-1.61433	-0.690933	1.61433	down	1.41204e-09	1.17808e-07
56954	NIT2	nitrilase family member 2	9.15915	9.04122	8.99565	8.43472	8.54463	8.42036	-1.51442	-0.59877	1.51442	down	1.25116e-08	5.87604e-07
5831	PYCR1	pyrroline-5-carboxylate reductase 1	8.56834	8.55094	8.44472	7.66882	7.77415	7.73057	-1.73727	-0.79682	1.73727	down	2.42616e-10	3.46341e-08
57491	AHRR	aryl-hydrocarbon receptor repressor	4.23301	4.09901	4.12869	3.54434	3.58549	3.51736	-1.52046	-0.604507	1.52046	down	5.25462e-06	6.08725e-05
1537	CYC1	cytochrome c-1	10.5907	10.5379	10.513	9.59726	9.7727	9.70179	-1.81078	-0.856613	1.81078	down	1.76592e-11	6.09057e-09
684959	SNORA25	small nucleolar RNA, H/ACA box 25	6.47529	6.53672	6.40839	5.30277	5.37107	5.10188	-2.32124	-1.21489	2.32124	down	7.36333e-10	7.40439e-08
255919	CNEP1R1	CTD nuclear envelope phosphatase 1 regulatory subunit 1	6.5208	6.46676	6.60233	7.32189	7.31511	7.3732	1.74929	0.80677	1.74929	up	1.34728e-09	1.14033e-07
11198	SUPT16H	SPT16 homolog, facilitates chromatin remodeling subunit	9.66093	9.53333	9.57687	8.95331	9.04442	9.01032	-1.50284	-0.587693	1.50284	down	1.52066e-09	1.24561e-07
3998	LMAN1	lectin, mannose-binding, 1	7.92924	7.73119	7.77909	7.09809	7.28817	7.18665	-1.53922	-0.622203	1.53922	down	1.59621e-07	3.93231e-06
169834	ZNF883	zinc finger protein 883	5.26013	5.30401	4.97325	5.98447	6.00129	6.03277	1.77405	0.827047	1.77405	up	2.56943e-07	5.60839e-06
1843	DUSP1	dual specificity phosphatase 1	7.83188	7.7949	7.82026	6.70797	6.86287	6.79087	-2.03982	-1.02844	2.03982	down	3.33399e-11	9.29685e-09
51083	GAL	galanin/GMAP prepropeptide	8.36191	8.37122	8.32493	7.56698	7.62646	7.5332	-1.71373	-0.77714	1.71373	down	1.09226e-10	1.98822e-08
643836	ZFP62	ZFP62 zinc finger protein	4.60324	4.62758	4.42432	5.15015	5.19673	5.54448	1.67645	0.745407	1.67645	up	7.0792e-06	7.73811e-05
26953	RANBP6	RAN binding protein 6	8.39232	8.43356	8.44812	9.1587	9.06227	9.04434	1.58422	0.66377	1.58422	up	3.63642e-10	4.60986e-08
130612	TMEM198	transmembrane protein 198	6.19705	6.07675	6.32628	6.70902	6.7334	7.02796	1.54054	0.623433	1.54054	up	7.03503e-06	7.70483e-05
23405	DICER1	dicer 1, ribonuclease type III	7.82446	7.75179	7.80978	8.59545	8.55028	8.39893	1.64666	0.719543	1.64666	up	2.89478e-09	2.00382e-07
79669	C3orf52	chromosome 3 open reading frame 52	6.48733	6.49092	6.60859	7.45987	7.47644	7.39174	1.88392	0.913737	1.88392	up	3.18271e-10	4.19926e-08
266812	NAP1L5	nucleosome assembly protein 1-like 5	5.54303	5.68396	5.54608	6.26681	6.30217	6.2775	1.61456	0.691137	1.61456	up	8.73542e-08	2.47848e-06
157506	RDH10	retinol dehydrogenase 10 (all-trans)	7.35958	7.34742	7.29778	6.69503	6.65298	6.6243	-1.59935	-0.67749	1.59935	down	4.80565e-09	2.90243e-07
9167	COX7A2L	cytochrome c oxidase subunit VIIa polypeptide 2 like	10.2418	10.2183	10.1791	9.07929	9.26295	9.17181	-2.05869	-1.04173	2.05869	down	2.15272e-12	1.43459e-09
22834	ZNF652	zinc finger protein 652	7.4038	7.41236	7.28879	7.98612	7.99335	7.92715	1.5163	0.600557	1.5163	up	1.29344e-08	6.01842e-07
6222	RPS18	ribosomal protein S18	7.86201	7.85662	7.88817	7.0356	7.27937	7.07763	-1.66794	-0.738067	1.66794	down	1.38954e-08	6.26536e-07
4090	SMAD5	SMAD family member 5	5.80863	6.05745	5.9274	5.41636	5.21904	5.15015	-1.59031	-0.66931	1.59031	down	3.19211e-06	4.09887e-05
593	BCKDHA	branched chain keto acid dehydrogenase E1, alpha polypeptide	8.6473	8.53155	8.55962	7.70358	7.90012	8.03613	-1.62399	-0.699547	1.62399	down	1.10558e-07	2.95708e-06
84273	NOA1	nitric oxide associated 1	9.92531	9.81555	9.9338	8.92579	9.02185	8.91226	-1.91621	-0.938253	1.91621	down	6.31387e-12	3.10311e-09
2700	GJA3	gap junction protein alpha 3	5.40185	5.45786	5.48768	4.44076	4.76055	4.64496	-1.78226	-0.833707	1.78226	down	2.86981e-07	6.09591e-06
7357	UGCG	UDP-glucose ceramide glucosyltransferase	7.79661	7.6954	7.68525	7.12549	7.11206	7.06757	-1.54119	-0.624047	1.54119	down	9.33272e-09	4.77052e-07
7587	ZNF37A	zinc finger protein 37A	5.53545	5.68175	5.64888	6.22362	6.43528	6.25788	1.60611	0.683567	1.60611	up	4.05864e-07	8.01898e-06
554282	FAM72C	family with sequence similarity 72 member C	7.88685	7.89132	7.86845	7.28342	7.26985	7.11206	-1.58055	-0.66043	1.58055	down	1.05411e-08	5.22643e-07
4277	MICB	MHC class I polypeptide-related sequence B	6.53924	6.5873	6.48925	6.97705	7.46357	7.20852	1.59968	0.677783	1.59968	up	5.7343e-06	6.53511e-05
222068	TMED4	transmembrane p24 trafficking protein 4	6.41406	6.3328	6.29766	6.90221	6.95687	6.98899	1.51696	0.601183	1.51696	up	8.7369e-08	2.47848e-06
148170	CDC42EP5	CDC42 effector protein (Rho GTPase binding) 5	7.23359	7.13158	7.09715	6.32202	6.63814	6.55352	-1.56868	-0.649547	1.56868	down	9.20499e-07	1.52068e-05
3904	LAIR2	leukocyte-associated immunoglobulin-like receptor 2	6.66566	6.54182	6.33101	5.60395	5.57795	5.65836	-1.8653	-0.89941	1.8653	down	4.38518e-08	1.48738e-06
84520	C14orf142	chromosome 14 open reading frame 142	7.3771	7.39662	7.40944	6.79374	6.64514	6.78136	-1.57386	-0.654307	1.57386	down	1.80969e-08	7.69797e-07
3899	AFF3	AF4/FMR2 family member 3	4.9054	5.17498	4.83968	4.16641	4.27084	4.17958	-1.7026	-0.767743	1.7026	down	1.6792e-06	2.44347e-05
5142	PDE4B	phosphodiesterase 4B	5.62931	5.46381	5.31025	4.66207	4.53977	4.52066	-1.85784	-0.893623	1.85784	down	1.64175e-07	4.00562e-06
80235	PIGZ	phosphatidylinositol glycan anchor biosynthesis class Z	4.97881	4.96167	4.92441	5.59934	5.81178	5.48131	1.59753	0.675847	1.59753	up	2.53845e-06	3.42752e-05
3280	HES1	hes family bHLH transcription factor 1	5.72863	5.88814	5.96931	6.50822	6.59502	6.64076	1.64639	0.719307	1.64639	up	1.66168e-07	4.03544e-06
100532724	NPHP3-ACAD11	NPHP3-ACAD11 readthrough (NMD candidate)	7.14176	7.25406	7.15106	6.58287	6.62278	6.56486	-1.50746	-0.592123	1.50746	down	5.47264e-08	1.74626e-06
23141	ANKLE2	ankyrin repeat and LEM domain containing 2	7.59657	7.66622	7.63258	8.35831	8.20541	8.26541	1.56329	0.644587	1.56329	up	4.38045e-09	2.7029e-07
8503	PIK3R3	phosphoinositide-3-kinase regulatory subunit 3	6.84205	6.94285	6.88068	7.96841	8.10098	7.96985	2.18034	1.12455	2.18034	up	1.27582e-11	5.06695e-09
3576	CXCL8	chemokine (C-X-C motif) ligand 8	6.41502	6.48264	6.28909	5.50896	5.61106	5.75564	-1.7057	-0.770363	1.7057	down	1.78168e-07	4.27064e-06
57695	USP37	ubiquitin specific peptidase 37	7.08956	7.03345	6.98606	6.19685	6.28451	6.25389	-1.7306	-0.791273	1.7306	down	2.68196e-09	1.89657e-07
100505477	LINC01602	long intergenic non-protein coding RNA 1602	3.87631	4.1819	4.25711	3.23746	3.61406	3.36395	-1.62445	-0.69995	1.62445	down	4.96326e-05	0.000376874
50862	RNF141	ring finger protein 141	6.11179	6.01741	6.05901	6.96199	6.98699	6.94293	1.86766	0.901233	1.86766	up	4.82844e-10	5.53914e-08
860	RUNX2	runt-related transcription factor 2	7.74748	7.78647	7.75399	7.01153	6.81666	6.94075	-1.78964	-0.839667	1.78964	down	9.41838e-10	8.78107e-08
1973	EIF4A1	eukaryotic translation initiation factor 4A1	11.8105	11.908	11.916	11.2538	11.2417	11.2594	-1.54383	-0.62651	1.54383	down	1.18539e-11	4.75585e-09
9498	SLC4A8	solute carrier family 4, sodium bicarbonate cotransporter, member 8	5.19673	5.33036	4.97079	5.80416	5.93825	5.75541	1.58738	0.666647	1.58738	up	6.04551e-06	6.82254e-05
837	CASP4	caspase 4	6.43394	6.33853	6.37332	5.59012	5.42625	5.44386	-1.85985	-0.895187	1.85985	down	6.24678e-09	3.50998e-07
9525	VPS4B	vacuolar protein sorting 4 homolog B (S. cerevisiae)	4.32611	4.97444	5.01582	5.68665	5.61673	5.6873	1.85502	0.891437	1.85502	up	2.48595e-05	0.000212807
57561	ARRDC3	arrestin domain containing 3	6.92342	7.11293	7.14199	8.02776	7.63525	7.76067	1.67998	0.748447	1.67998	up	8.03761e-07	1.37641e-05
132864	CPEB2	cytoplasmic polyadenylation element binding protein 2	5.00926	5.2363	5.25471	5.9659	5.86638	5.79048	1.63297	0.707497	1.63297	up	9.91785e-07	1.61403e-05
55216	C11orf57	chromosome 11 open reading frame 57	7.53981	7.52051	7.52491	8.26571	8.14731	8.13702	1.57455	0.654937	1.57455	up	2.48247e-09	1.7881e-07
3188	HNRNPH2	heterogeneous nuclear ribonucleoprotein H2 (H')	9.42217	9.49581	9.50043	8.99071	8.73282	8.82751	-1.53949	-0.622457	1.53949	down	2.97586e-08	1.11859e-06
730755	KRTAP2-3	keratin associated protein 2-3	5.88108	6.17028	6.10636	5.14788	4.74154	5.41094	-1.93516	-0.952453	1.93516	down	7.32418e-06	7.94844e-05
3082	HGF	hepatocyte growth factor (hepapoietin A; scatter factor)	10.3288	10.2703	10.2925	9.37907	9.56614	9.43087	-1.7882	-0.838507	1.7882	down	3.88784e-11	1.02072e-08
5046	PCSK6	proprotein convertase subtilisin/kexin type 6	4.89125	5.06386	5.04437	4.37193	4.36319	4.39121	-1.54155	-0.624383	1.54155	down	2.23261e-06	3.08223e-05
374393	FAM111B	family with sequence similarity 111 member B	3.38876	3.84009	3.6326	4.2322	4.21794	4.3414	1.56197	0.643363	1.56197	up	4.55032e-05	0.000351216
51094	ADIPOR1	adiponectin receptor 1	8.49358	8.3965	8.32472	7.72658	7.87004	7.85879	-1.50156	-0.586463	1.50156	down	5.15852e-08	1.66658e-06
11020	IFT27	intraflagellar transport 27	6.76963	6.82612	6.47996	7.32311	7.43652	7.36144	1.60413	0.681787	1.60413	up	7.75564e-07	1.33744e-05
1979	EIF4EBP2	eukaryotic translation initiation factor 4E binding protein 2	5.55767	5.80363	5.54297	6.2293	6.47928	6.46599	1.6897	0.756767	1.6897	up	8.67857e-07	1.45364e-05
5414	SEPT4	septin 4	4.53524	4.27958	4.21588	3.49272	3.83933	3.75633	-1.56639	-0.64744	1.56639	down	5.24589e-05	0.000393322
151195	CCNYL1	cyclin Y like 1	7.08362	7.03898	7.06825	7.68654	7.77824	7.70767	1.58067	0.660533	1.58067	up	2.92507e-09	2.0138e-07
9818	NUP58	nucleoporin 58kDa	7.11988	7.08304	7.05232	5.99524	6.17196	6.36254	-1.87709	-0.9085	1.87709	down	3.03611e-08	1.12589e-06
3632	INPP5A	inositol polyphosphate-5-phosphatase A	7.67247	7.68707	7.6393	8.56128	8.603	8.53117	1.8646	0.89887	1.8646	up	8.72357e-12	3.81104e-09
157680	VPS13B	vacuolar protein sorting 13 homolog B (yeast)	8.01815	8.1617	8.08406	8.73577	8.77688	8.73928	1.58301	0.662673	1.58301	up	9.34781e-10	8.77178e-08
347918	EP400NL	EP400 N-terminal like	4.53186	4.85064	4.60779	5.32755	5.19673	5.28462	1.52225	0.606203	1.52225	up	1.36801e-05	0.000130869
7462	LAT2	linker for activation of T-cells family member 2	5.03617	5.00837	5.13864	4.33614	4.42398	4.28057	-1.64053	-0.714163	1.64053	down	5.18916e-07	9.79019e-06
56647	BCCIP	BRCA2 and CDKN1A interacting protein	5.32691	5.26728	5.2291	5.84122	6.07452	5.83751	1.56192	0.64332	1.56192	up	1.62844e-06	2.39085e-05
28966	SNX24	sorting nexin 24	7.3933	7.7025	7.66685	7.06319	6.71352	6.95015	-1.60058	-0.678597	1.60058	down	4.16453e-06	5.06938e-05
6645	SNTB2	syntrophin, beta 2 (dystrophin-associated protein A1, 59kDa, basic component 2)	5.65631	5.48733	5.60007	6.19351	6.25451	6.23182	1.56415	0.645377	1.56415	up	2.55765e-07	5.60231e-06
90507	SCRN2	secernin 2	8.37171	8.35514	8.31892	7.6219	7.58291	7.52971	-1.70576	-0.770417	1.70576	down	1.23941e-10	2.1755e-08
146712	B3GNTL1	UDP-GlcNAc:betaGal beta-1,3-N-acetylglucosaminyltransferase-like 1	6.33322	6.17276	6.09036	5.39305	5.86461	5.43266	-1.5533	-0.63534	1.5533	down	6.21461e-05	0.000452744
124935	SLC43A2	solute carrier family 43 (amino acid system L transporter), member 2	6.78442	6.7658	6.80027	7.243	7.48483	7.45032	1.52543	0.60922	1.52543	up	2.46627e-07	5.45074e-06
64073	C19orf33	chromosome 19 open reading frame 33	8.4508	8.51209	8.37614	7.75311	7.95022	7.81047	-1.52458	-0.60841	1.52458	down	4.26079e-08	1.45548e-06
55270	NUDT15	nudix hydrolase 15	8.17199	8.32938	8.21292	7.66182	7.65952	7.60865	-1.51023	-0.594767	1.51023	down	1.34681e-08	6.15741e-07
4800	NFYA	nuclear transcription factor Y subunit alpha	7.65493	7.71248	7.72935	6.69689	6.78314	6.78636	-1.92313	-0.943457	1.92313	down	6.73118e-11	1.51498e-08
27	ABL2	ABL proto-oncogene 2, non-receptor tyrosine kinase	6.65705	6.61369	6.47119	5.98308	6.00729	5.98953	-1.50248	-0.587343	1.50248	down	4.51691e-07	8.76278e-06
57589	RIC1	RIC1 homolog, RAB6A GEF complex partner 1	6.19393	6.16927	6.2415	7.11398	6.66784	6.85729	1.60007	0.678137	1.60007	up	3.76681e-06	4.65149e-05
10772	SRSF10	serine/arginine-rich splicing factor 10	5.79384	6.08757	5.77567	4.97839	5.09693	5.10673	-1.77155	-0.82501	1.77155	down	3.7351e-07	7.53112e-06
57577	CCDC191	coiled-coil domain containing 191	5.72702	5.78271	5.66896	6.359	6.37026	6.36081	1.55523	0.637127	1.55523	up	1.09567e-07	2.94661e-06
5311	PKD2	polycystic kidney disease 2 (autosomal dominant)	4.36267	4.87245	4.63191	5.05823	5.49157	5.35427	1.60104	0.679013	1.60104	up	0.000139019	0.00088575
8555	CDC14B	cell division cycle 14B	5.70926	5.65836	5.51791	5.0649	4.96755	5.03687	-1.5214	-0.605403	1.5214	down	2.02327e-06	2.84925e-05
23446	SLC44A1	solute carrier family 44 (choline transporter), member 1	9.99616	9.97755	9.96866	8.98287	9.02377	9.00779	-1.96698	-0.97598	1.96698	down	9.0213e-14	1.36423e-10
114932	MRFAP1L1	Morf4 family associated protein 1-like 1	8.33047	8.31746	8.32258	9.0041	9.03254	8.97075	1.60099	0.67896	1.60099	up	6.64766e-11	1.51498e-08
55161	TMEM33	transmembrane protein 33	7.86823	7.95325	7.93976	7.05789	6.89572	7.09108	-1.87322	-0.905517	1.87322	down	5.28711e-10	5.88891e-08
5463	POU6F1	POU class 6 homeobox 1	4.97403	5.11644	5.04203	4.23289	4.53862	4.33653	-1.5964	-0.67482	1.5964	down	4.43123e-06	5.31969e-05
284361	EMC10	ER membrane protein complex subunit 10	8.43468	8.42209	8.46753	7.25868	7.38391	7.32071	-2.17397	-1.12033	2.17397	down	2.03469e-12	1.42857e-09
8531	YBX3	Y-box binding protein 3	9.84084	9.87318	9.84353	10.5265	10.5652	10.4894	1.59606	0.674517	1.59606	up	6.9978e-12	3.35536e-09
56681	SAR1A	secretion associated, Ras related GTPase 1A	9.02282	9.21348	9.25426	10.1563	9.88494	9.97512	1.79247	0.84195	1.79247	up	8.40962e-09	4.41455e-07
22862	FNDC3A	fibronectin type III domain containing 3A	8.93588	8.85077	8.8527	9.57367	9.44208	9.5015	1.54324	0.625967	1.54324	up	9.0935e-10	8.59467e-08
116238	TLCD1	TLC domain containing 1	6.20783	6.06591	6.07652	5.51324	5.68665	5.33307	-1.52179	-0.605767	1.52179	down	9.27098e-06	9.65095e-05
162073	ITPRIPL2	inositol 1,4,5-trisphosphate receptor interacting protein-like 2	7.66964	7.72768	7.65322	8.2492	8.3227	8.34488	1.53909	0.62208	1.53909	up	2.53127e-09	1.81614e-07
23011	RAB21	RAB21, member RAS oncogene family	8.10136	8.12743	8.0588	7.32313	7.20535	7.204	-1.80463	-0.851703	1.80463	down	1.56348e-10	2.5402e-08
84058	WDR54	WD repeat domain 54	10.3851	10.3343	10.3808	9.68307	9.74531	9.73086	-1.5659	-0.64699	1.5659	down	1.60816e-11	5.78452e-09
7453	WARS	tryptophanyl-tRNA synthetase	7.85051	7.76178	7.72913	6.97925	7.11083	7.06255	-1.65818	-0.729597	1.65818	down	3.24277e-09	2.16467e-07
91694	LONRF1	LON peptidase N-terminal domain and ring finger 1	6.36641	6.29388	6.19882	5.62291	5.70805	5.52879	-1.58717	-0.666453	1.58717	down	3.68451e-07	7.45203e-06
284273	ZADH2	zinc binding alcohol dehydrogenase domain containing 2	7.0068	7.13193	6.96155	7.6693	7.71999	7.59125	1.54409	0.626753	1.54409	up	4.88626e-08	1.60903e-06
2799	GNS	glucosamine (N-acetyl)-6-sulfatase	9.11939	9.18144	9.22426	9.947	9.85044	9.87999	1.64427	0.717447	1.64427	up	5.69015e-11	1.34794e-08
9825	SPATA2	spermatogenesis associated 2	5.47024	5.26475	5.00977	5.78586	5.99258	6.05329	1.61962	0.695657	1.61962	up	1.87756e-05	0.000169551
100129800	ZNF807	zinc finger protein 807	4.51386	4.68816	4.55569	5.28549	5.38586	5.30791	1.67077	0.740517	1.67077	up	2.85975e-07	6.0877e-06
7039	TGFA	transforming growth factor alpha	6.10833	6.19008	6.13191	5.24094	5.20557	5.50478	-1.77319	-0.826343	1.77319	down	1.54045e-07	3.82369e-06
23366	KIAA0895	KIAA0895	5.66768	5.56494	5.43453	6.30241	6.41621	6.22118	1.69062	0.75755	1.69062	up	2.01961e-07	4.67651e-06
8558	CDK10	cyclin-dependent kinase 10	5.99426	5.7948	5.76538	5.05794	5.10703	5.23698	-1.64433	-0.717497	1.64433	down	7.15249e-07	1.25714e-05
11343	MGLL	monoglyceride lipase	7.8649	7.83469	7.76204	7.09473	7.07687	7.17469	-1.63027	-0.705113	1.63027	down	2.26593e-09	1.66926e-07
728715	LOC728715	ovostatin homolog 2	7.57621	7.53272	7.54323	6.66151	6.52885	6.53924	-1.96453	-0.974187	1.96453	down	1.00175e-10	1.90275e-08
56704	JPH1	junctophilin 1	6.69123	6.59075	6.76587	5.87882	5.99156	5.95734	-1.67023	-0.740043	1.67023	down	3.46793e-08	1.23258e-06
7128	TNFAIP3	TNF alpha induced protein 3	6.04766	5.967	5.8836	5.04098	5.37314	5.12195	-1.72596	-0.787397	1.72596	down	6.20913e-07	1.12399e-05
9324	HMGN3	high mobility group nucleosomal binding domain 3	9.34966	9.40422	9.43307	9.99435	9.95385	10.0033	1.50335	0.58818	1.50335	up	1.4114e-10	2.40911e-08
56270	WDR45B	WD repeat domain 45B	9.26072	9.23426	9.1654	8.36248	8.49172	8.39073	-1.74733	-0.80515	1.74733	down	6.97247e-11	1.53952e-08
27165	GLS2	glutaminase 2	7.65493	7.73577	7.5762	7.01048	7.07978	7.09495	-1.50932	-0.593897	1.50932	down	4.45275e-08	1.49916e-06
29126	CD274	CD274 molecule	10.2028	10.1737	10.1664	9.45855	9.53725	9.45202	-1.62266	-0.698363	1.62266	down	1.36594e-11	5.31815e-09
79026	AHNAK	AHNAK nucleoprotein	6.62163	6.52046	6.49993	7.72565	7.83435	7.79549	2.35842	1.23782	2.35842	up	5.0324e-12	2.56966e-09
284217	LAMA1	laminin subunit alpha 1	8.79593	8.74448	8.75578	7.47191	7.6494	7.55388	-2.30857	-1.207	2.30857	down	1.63354e-12	1.1894e-09
56122	PCDHB14	protocadherin beta 14	5.22433	5.5301	5.53507	6.53426	6.69044	6.6178	2.27258	1.18433	2.27258	up	3.10959e-09	2.11088e-07
7559	ZNF12	zinc finger protein 12	7.14956	7.0733	7.06019	7.74973	7.78803	7.67666	1.56243	0.64379	1.56243	up	7.78134e-09	4.1796e-07
3037	HAS2	hyaluronan synthase 2	6.25947	6.20795	6.09502	5.16482	5.34019	5.20347	-1.93364	-0.95132	1.93364	down	8.0503e-09	4.30038e-07
25850	ZNF345	zinc finger protein 345	4.51832	4.56172	4.39224	5.10244	5.26059	5.0153	1.55331	0.63535	1.55331	up	5.13915e-06	5.97284e-05
8357	HIST1H3H	histone cluster 1, H3h	4.29726	4.51708	4.2649	4.64703	5.21134	5.01452	1.51349	0.597883	1.51349	up	0.000331135	0.00182833
56951	C5orf15	chromosome 5 open reading frame 15	6.69383	6.57751	6.67848	7.4675	7.53615	7.5296	1.81648	0.861143	1.81648	up	4.09038e-10	4.94848e-08
654320	SNORA8	small nucleolar RNA, H/ACA box 8	6.90332	7.04184	6.84601	6.11912	6.22415	6.21699	-1.67439	-0.743637	1.67439	down	3.03447e-08	1.12589e-06
647087	C7orf73	chromosome 7 open reading frame 73	4.90285	4.92651	5.00981	6.21738	6.1235	6.05148	2.27268	1.1844	2.27268	up	3.64634e-10	4.60986e-08
2157	F8	coagulation factor VIII, procoagulant component	7.29554	7.23204	7.35004	6.55433	6.6797	6.6797	-1.57421	-0.65463	1.57421	down	3.04109e-08	1.12589e-06
